# Supplementary material for: The endosomal sorting adaptor HD-PTP is required for ephrin-B:EphB signalling in cellular collapse and spinal motor axon guidance
Source: PubMed Central journal article supplement (PMC6697728; doi:10.1038/s41598-019-48421-9), 2019-08-16
Supplement: 41598_2019_48421_MOESM1_ESM.pdf [file 41598_2019_48421_MOESM1_ESM.pdf]

## Supplementary Materials

The endosomal sorting adaptor HD-PTP is required for ephrin-B:EphB signalling in cellular collapse and spinal motor axon guidance.

Sylvie Lahaie<sup>1,2†</sup>, Daniel Morales<sup>1,2†^</sup>, Halil Bagci<sup>1,3</sup>, Noumeira Hamoud<sup>1</sup>, Charles-Etienne Castonguay<sup>1</sup>, Jalal M. Kazan<sup>4,5</sup>, Guillaume Desrochers<sup>4,5</sup>, Avihu Klar<sup>6</sup>, Anne-Claude Gingras<sup>7,8</sup>, Arnim Pause<sup>4,5</sup>, Jean-François Côté<sup>1,3,9,10</sup> and Artur Kania<sup>1,2,3,11\*</sup>

<sup>1</sup>Institut de recherches cliniques de Montréal (IRCM), Montréal, QC, H2W 1R7, Canada

<sup>2</sup>Integrated Program in Neuroscience, McGill University, Montréal, QC, H3A 2B4, Canada

<sup>3</sup>Department of Anatomy and Cell Biology, McGill University, Montréal, QC, H3A 0C7, Canada

<sup>4</sup>Goodman Cancer Research Centre, McGill University, Montréal, QC, H3A 1A3, Canada

<sup>5</sup>Department of Biochemistry, McGill University, Montréal, QC, H3G 1Y6, Canada

<sup>6</sup>Department of Medical Neurobiology, IMRIC, Hebrew University-Hadassah Medical School, Jerusalem, 91120, Israel

<sup>7</sup>Lunenfeld-Tanenbaum Research Institute, Mount Sinai Hospital, Toronto, ON, M5G 1X5, Canada

<sup>8</sup>Department of Molecular Genetics, University of Toronto, Toronto, ON, M5S 1A8, Canada

<sup>9</sup>Programmes de Biologie Moléculaire, Département de Médecine, Université de Montréal, Montréal, QC, H3T 1J4, Canada

<sup>10</sup>Département de Biochimie, Université de Montréal, Montréal, QC, H3C 3J7, Canada

<sup>11</sup>Department of Biology and Division of Experimental Medicine, McGill University, Montréal, QC, H3A 2B2, Canada

\* Correspondence: [artur.kania@ircm.qc.ca](mailto:artur.kania@ircm.qc.ca)

† These authors contributed equally to this work.

^ Current address: Neuroengineering Laboratory, Brain Mind Institute, École polytechnique fédérale de Lausanne (EPFL), Station 19, CH-1015, Lausanne, Switzerland

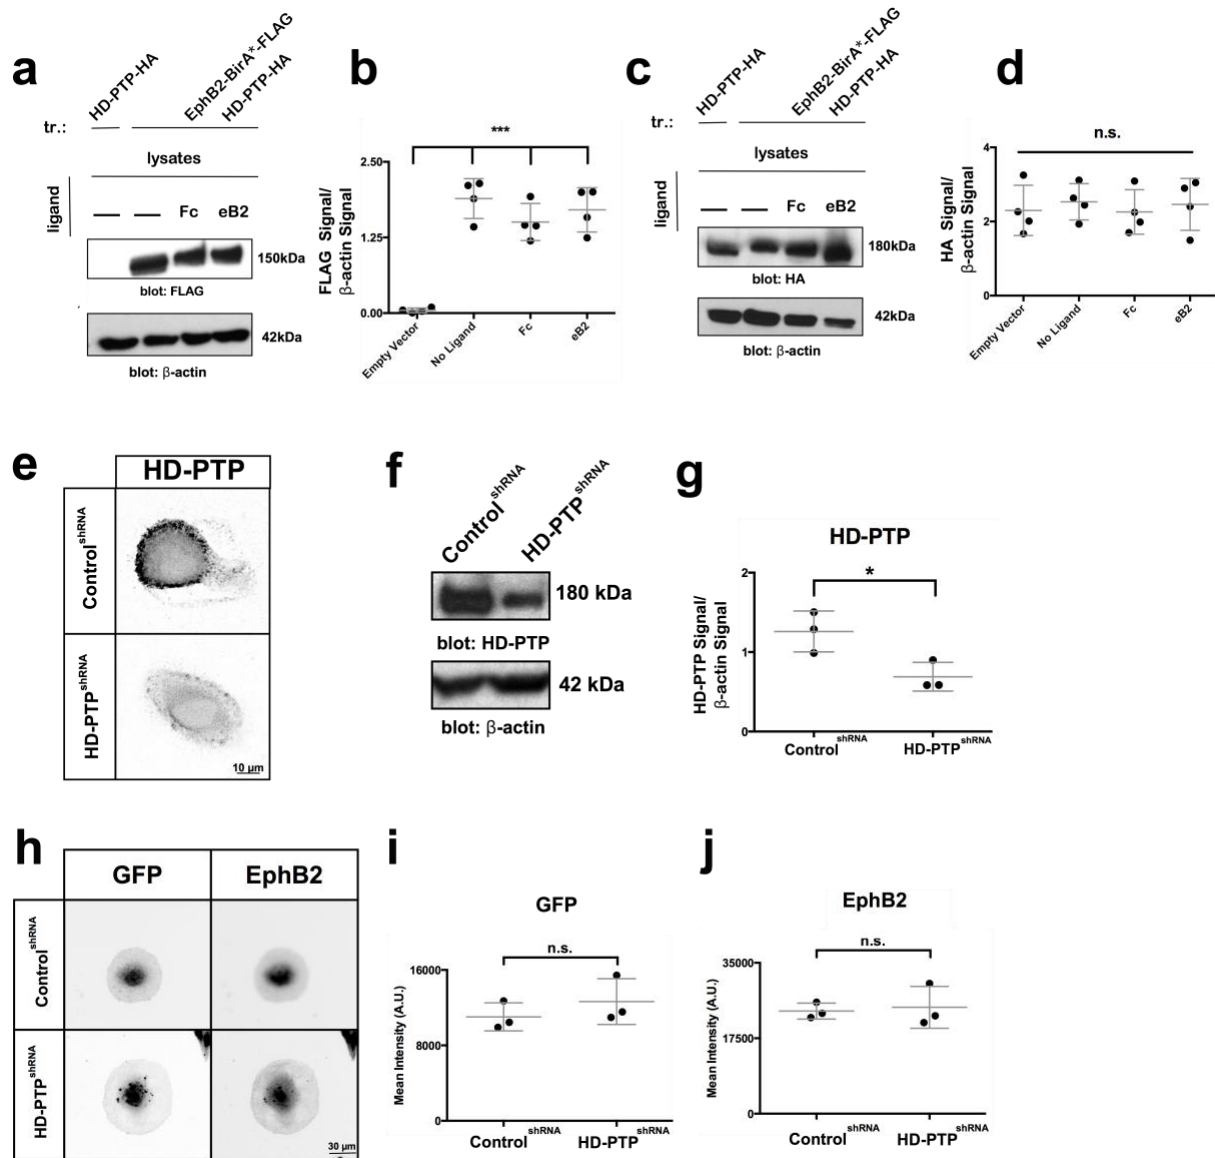

**Supplementary Figure S1 related to Figure 2 and Figure 3. Co-IP total cell lysate quantification and HD-PTP shRNA HeLa cell characterisation.** (a) Representative Western blot of FLAG and  $\beta$ -actin in lysates of HEK293 cells transfected with HD-PTP-HA and expressing either EphB2-BirA\*-FLAG or FLAG alone. (b) Quantification of FLAG signal normalised to  $\beta$ -actin ( $p < 0.001$ ) ( $n = 4$ , one-way ANOVA followed by Student's t-tests corrected for multiple comparisons). (c) Representative Western blot of HA and  $\beta$ -actin in lysates of HEK293 cells transfected with HD-PTP-HA and expressing either EphB2-BirA\*-FLAG or FLAG alone. (d) Quantification of HA signal normalised to  $\beta$ -actin ( $p = 0.912$ ) ( $n = 4$ , one-way ANOVA followed by Student's t-tests corrected for multiple comparisons). (e) Representative images of Control<sup>shRNA</sup> and HD-PTP<sup>shRNA</sup> HeLa cells stained with anti-HD-PTP (f) Representative Western blot of HD-PTP and  $\beta$ -actin in lysates of HeLa cells stably expressing Control<sup>shRNA</sup> and HD-PTP<sup>shRNA</sup>. (g) Quantification of HD-PTP signal normalised to  $\beta$ -actin ( $p =$

0.0492) ( $n = 3$ , Student's  $t$ -tests). **(h)** Representative inverted grayscale fluorescent images of Control<sup>shRNA</sup> and HD-PTP<sup>shRNA</sup> HeLa cells transfected with EphB2-GFP plasmid, showing GFP and anti-EphB2 signals. **(i)** Quantification of GFP mean pixel intensity in Control<sup>shRNA</sup> and HD-PTP<sup>shRNA</sup> HeLa cells transfected with EphB2-GFP plasmid ( $n = 3$ , 60-80 cells/ $n$ ; Student's  $t$ -test). **(j)** Quantification of EphB2 mean pixel intensity in Control<sup>shRNA</sup> and HD-PTP<sup>shRNA</sup> HeLa cells transfected with EphB2-GFP plasmid ( $n = 3$ , 60-80 cells/ $n$ ; Student's  $t$ -test). Values are plotted as mean  $\pm$  SD. All values can be found in Supplementary Table S4. Full Western blots can be found at the end of this document. kDa: kilodalton; A.U.: arbitrary units; eB2: ephrin-B2-Fc; \*  $p < 0.05$ ; n.s., not significant.

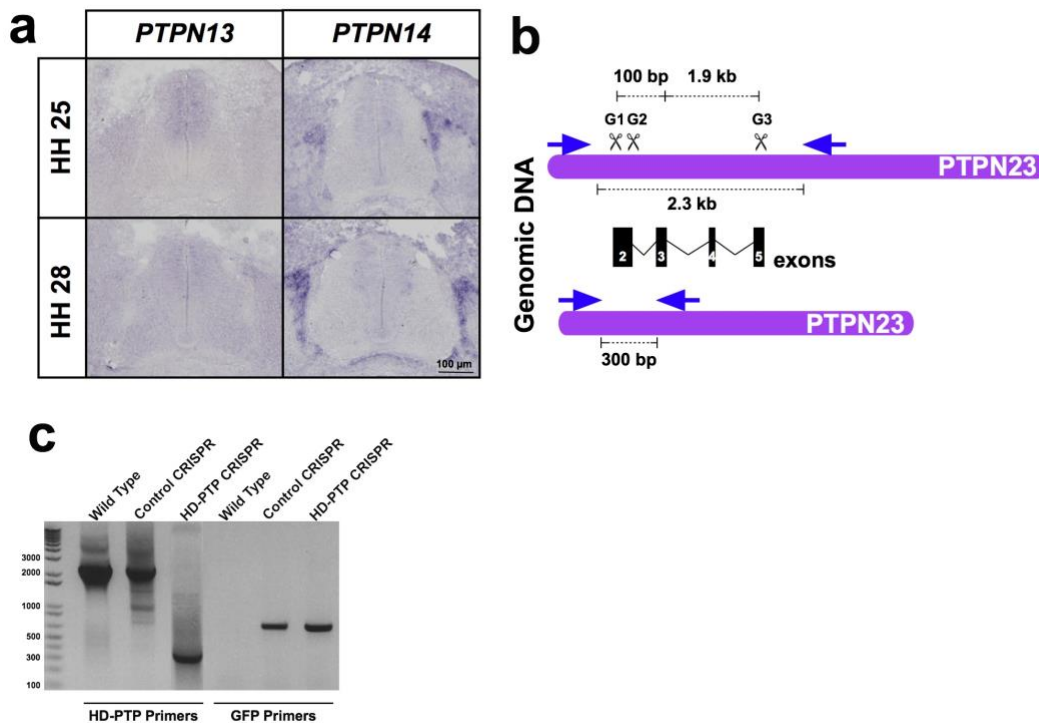

**Supplementary Figure S2 related to Figure 4. Chick spinal cord CRISPR.** (a) Representative images of chick embryonic spinal cord sections at HH st. 25 and HH st. 28 where *PTPN13* and *PTPN14* mRNA was detected using *in situ* hybridisation. Note absence from motor column, suggesting specificity in our *PTPN23* probe. (b) Schematic depicting the *PTPN23* genomic locus (chicken gene encoding HD-PTP), the location of CRISPR guides G1, G2 and G3 and PCR primers (arrows). The three guide RNAs produce deletions of exons 2-5. (c) Representative genomic PCR using the HD-PTP primers in (b) and GFP primers in DNA from a wild-type chick spinal cord, a Control<sup>CRISPR</sup>-electroporated spinal cord, and an HD-PTP<sup>CRISPR</sup>-electroporated spinal cord. HD-PTP primers show a full-length 2300 bp band in wild-type spinal cord and Control<sup>CRISPR</sup> spinal cord, and a cleaved 300 bp band in the HD-PTP<sup>CRISPR</sup> spinal cord. GFP primers show no band in wild-type spinal cords, and a 750 bp band in both Control<sup>CRISPR</sup> and HD-PTP<sup>CRISPR</sup> spinal cords ( $n = 3$ ). Full Western blot can be found at the end of this document. HH: Hamburger-Hamilton stage; G: guide RNA; bp: base pairs; kb: kilobase.

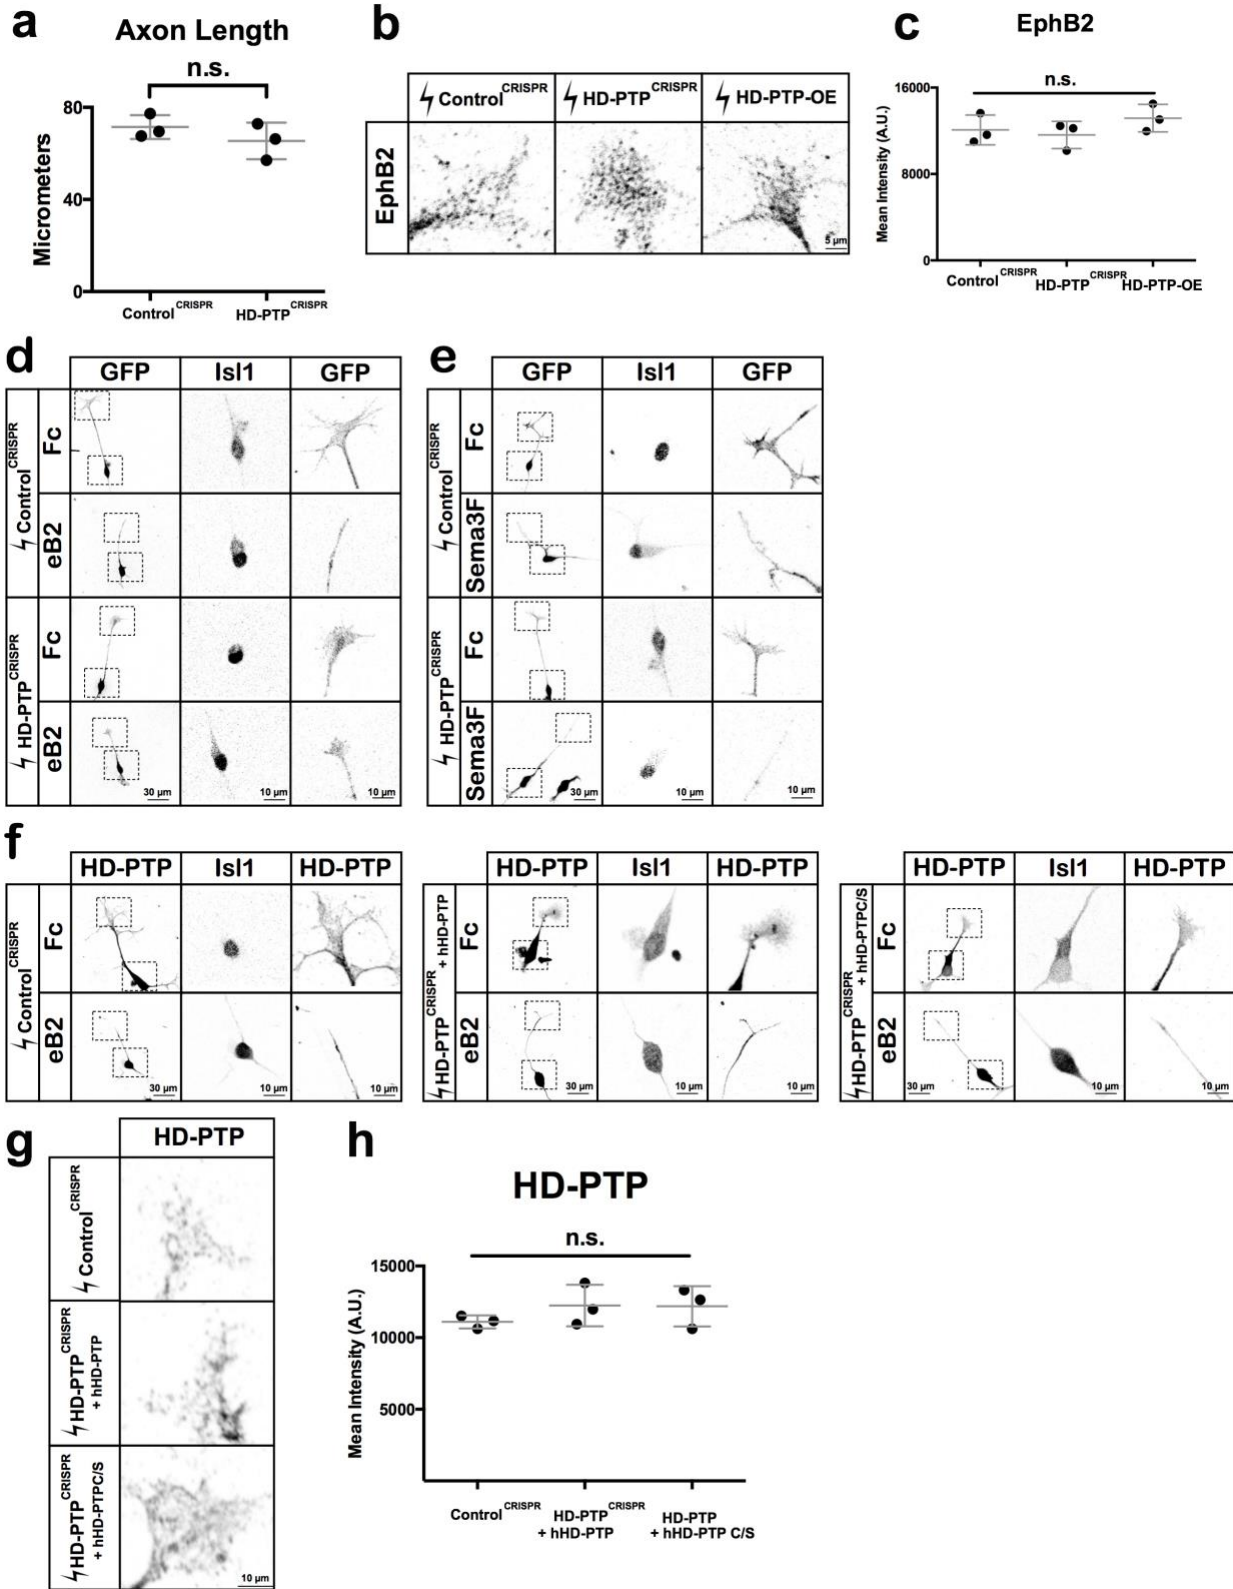

Supplementary Figure S3 related to Figure 5. Medial LMC growth cones require HD-PTP for ephrin-B2-induced collapse. (a) Quantification of Control<sup>CRISPR</sup> and HD-PTP<sup>CRISPR</sup>.

electroporated LMC motor neuron axon length *in vitro* ( $n = 3$ , 30-50 axons/ $n$ ; Student's *t*-test). **(b)** Representative images of growth cones of LMC neurons electroporated either with Control<sup>CRISPR</sup>, HD-PTP<sup>CRISPR</sup> or hHD-PTP-FLAG plasmids, stained with anti-EphB2 antibody. **(c)** Quantification of EphB2 mean pixel intensity in LMC growth cones electroporated with Control<sup>CRISPR</sup>, HD-PTP<sup>CRISPR</sup> or hHD-PTP-FLAG ( $n = 3$ , 10-12 growth cones/ $n$ ; Student's *t*-test). EphB2 levels are not affected by depleting HD-PTP. **(d)** Representative images of GFP<sup>+</sup> neurons from dissociated Control<sup>CRISPR</sup>- or HD-PTP<sup>CRISPR</sup>-electroporated motor neurons, incubated with eB2 or Fc and stained with anti-GFP and anti-Isl1 antibodies. Insets show medial LMC Isl1-expressing cell bodies and growth cones. **(e)** Representative images of GFP<sup>+</sup> neurons from dissociated Control<sup>CRISPR</sup>- or HD-PTP<sup>CRISPR</sup>-electroporated motor neurons, incubated with Sema3F or Fc and stained with anti-GFP and anti-Isl1 antibodies. Insets show medial LMC Isl1-expressing cell bodies and growth cones. **(f)** Representative images of rescue experiments with dissociated motor neurons electroporated with Control<sup>CRISPR</sup> plasmid or HD-PTP<sup>CRISPR</sup> co-electroporated with hHD-PTP or hHD-PTP C/S plasmid, incubated 30 min with 10  $\mu$ g/mL eB2 or Fc and stained with anti-HD-PTP and anti-Isl1 antibodies. Insets show medial LMC Isl1-expressing cell bodies and growth cones. **(g)** Representative inverted grayscale fluorescent images of Control<sup>CRISPR</sup>, HD-PTP<sup>CRISPR</sup> + hHD-PTP, and HD-PTP<sup>CRISPR</sup> + hHD-PTP C/S LMCm growth cones stained with the anti-HD-PTP antibody. **(h)** Quantification of HD-PTP mean pixel intensity of Control<sup>CRISPR</sup>, HD-PTP<sup>CRISPR</sup> + hHD-PTP, and HD-PTP<sup>CRISPR</sup> + hHD-PTP C/S LMCm growth cones ( $n = 3$ , 10-12 growth cones/ $n$ ; one-way ANOVA). Values are plotted as mean  $\pm$  SD. All values can be found in Supplementary Table S4. A.U.: arbitrary units; h: human; eB2: ephrin-B2-Fc; \*\*\*  $p < 0.001$ ; n.s.: not significant. Inverted grayscale fluorescent images.

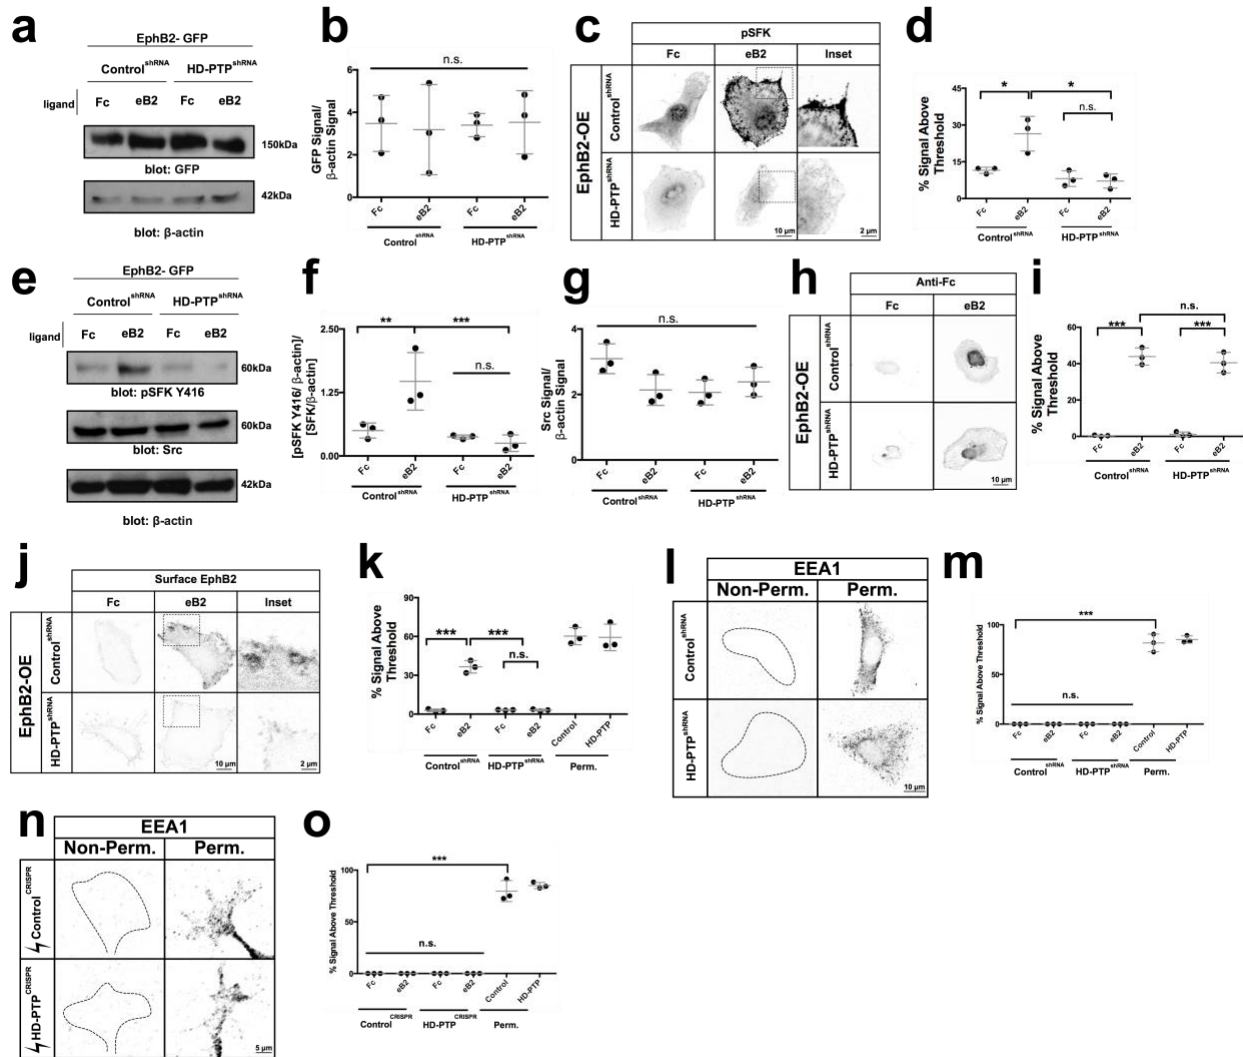

**Supplementary Figure S4 related to Figure 6. HD-PTP is required for ephrin-B2-induced SFK activation, EphB2 phosphorylation, and EphB2 surface patching.** (a) Representative Western blot using anti-GFP and anti-β-actin antibodies in Control<sup>shRNA</sup> and HD-PTP<sup>shRNA</sup> HeLa cell lysates, stimulated with 1 μg/mL eB2 or Fc for 5 min. The GFP band size corresponds to EphB2-GFP transfected into the HeLa cells. (b) Control<sup>shRNA</sup> and HD-PTP<sup>shRNA</sup> HeLa cell lysate EphB2-GFP expression normalised to β-actin is not significantly different ( $p = 0.8936$ ) ( $n = 3$ ; one-way ANOVA). (c) Representative images of Control<sup>shRNA</sup> and HD-PTP<sup>shRNA</sup> HeLa cells, incubated for 5 min with 1 μg/mL eB2 or Fc and stained with anti-phospho-Y418-SFK antibodies showing increased SFK activation following eB2 exposure. (d) Quantification of anti-phospho-Y418-SFK staining in Control<sup>shRNA</sup> and HD-PTP<sup>shRNA</sup> HeLa cells incubated for 5 min with 1 μg/mL eB2 or Fc. Control<sup>shRNA</sup> showed an increase in pSFK signal upon eB2 stimulation ( $p = 0.0227$ ), yet HD-PTP<sup>shRNA</sup> HeLa cells display no detectable increase in SFK phosphorylation ( $p = 0.7109$ ) ( $n = 3$ , 10-12 cells/ $n$ ; one-way ANOVA followed by corrected Student's  $t$ -tests). (e) Representative Western blot using anti-pSrc-Y416, anti-Src and anti-β-actin on Control<sup>shRNA</sup> and HD-PTP<sup>shRNA</sup> HeLa cells, stimulated with 1 μg/mL eB2 or Fc for 5 min. (f) Quantification of loading-normalised pSrc-Y416 signal over loading-normalised SFK signal shows ligand-induced activation of Src in Control<sup>shRNA</sup> HeLa cells ( $p = 0.0044$ ), but not in

HD-PTP<sup>shRNA</sup> cells ( $p = 0.8324$ ) ( $n = 3$ ; one-way ANOVA followed by Student's  $t$ -tests). Normalisation to loading was performed due to signals from same lysate being developed on different membranes. (g) Quantification of Src signal over  $\beta$ -actin signal no difference in Src levels compared to Control<sup>shRNA</sup> HeLa cells and HD-PTP<sup>shRNA</sup> cells ( $p = 0.7351$ ) ( $n = 3$ ; one-way ANOVA followed by Student's  $t$ -tests). (h) Representative images of Control<sup>shRNA</sup> and HD-PTP<sup>shRNA</sup> HeLa cells, incubated for 2 min with unclustered 1  $\mu$ g/mL eB2 or Fc and stained with anti-Fc antibodies showing increased anti-Fc staining following eB2 exposure. (i) Quantification of anti-Fc staining in Control<sup>shRNA</sup> and HD-PTP<sup>shRNA</sup> HeLa cells incubated for 2 min with 1  $\mu$ g/mL of unclustered eB2 or Fc. Control<sup>shRNA</sup> showed an increase in anti-Fc signal upon eB2 stimulation ( $p < 0.0001$ ), and HD-PTP<sup>shRNA</sup> HeLa cells display a detectable increase in anti-Fc signal after eB2 stimulation ( $p < 0.0001$ ) ( $n = 3$ , 10-12 cells/ $n$ ; one-way ANOVA followed by corrected Student's  $t$ -tests). (j) Representative images of Control<sup>shRNA</sup> and HD-PTP<sup>shRNA</sup> shRNA HeLa cells, incubated for 5 min with 1  $\mu$ g/mL eB2 or Fc and immunostained for EphB2 using a non-permeabilising fixation conditions (see methods and Supplemental Fig. S5). EphB2 patching is visualised through increased signal intensity of surface EphB2 staining. (k) Quantification of surface EphB2 patching in Control<sup>shRNA</sup> and HD-PTP<sup>shRNA</sup> HeLa cells, incubated for 5 min with 1  $\mu$ g/mL eB2 or Fc, measured by percentage of the cell area containing anti-EphB2 signal. In stark contrast to Control<sup>shRNA</sup> cells ( $p = 0.0003$ ), HD-PTP<sup>shRNA</sup> HeLa cells failed to elicit EphB2 surface patching upon ligand binding ( $p = 0.8609$ ) ( $n = 3$ , 10-12 cells/ $n$ ; one-way ANOVA followed by corrected Student's  $t$ -tests). (l) Representative images of Control<sup>shRNA</sup> and HD-PTP<sup>shRNA</sup> HeLa cells, non-permeabilised vs. permeabilised, stained with the anti-EEA1 antibody. (m) EEA1 signal quantification in Control<sup>shRNA</sup> and HD-PTP<sup>shRNA</sup> HeLa cells transfected with EphB2-GFP plasmid and incubated for 5 min with 1  $\mu$ g/mL eB2 or Fc. Controls for Fig. 8n ( $n = 3$ , 10-12 cells/ $n$ ; one-way ANOVA). (n) Representative images of Control<sup>CRISPR</sup> and HD-PTP<sup>CRISPR</sup> LMC growth cones, non-permeabilised vs. permeabilised, stained with an anti-EEA1 antibody. (o) EEA1 signal quantification in Control<sup>CRISPR</sup> and HD-PTP<sup>CRISPR</sup> LMC growth cones that were incubated for 15 min with 10  $\mu$ g/mL eB2 or Fc. Controls for Fig. 8p ( $n = 3$ , 10-12 growth cones/ $n$ ; one-way ANOVA). Values are plotted as mean  $\pm$  SD. All values can be found in Supplementary Table S4. Full Western blot can be found at the end of this document. kDa: kilodalton; eB2: ephrin-B2-Fc; Perm: permeabilised; \*\*\*  $p < 0.001$ ; \*\*  $p < 0.01$  \*  $p < 0.05$ ; n.s.: not significant. Inverted grayscale fluorescent images.



**a**

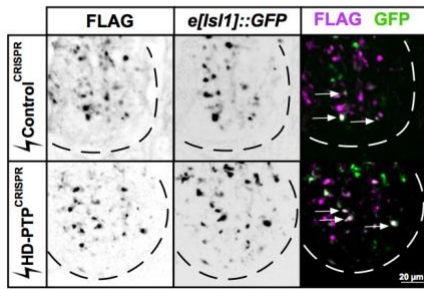

**Supplementary Figure S5 related to Figure 8. CRISPR construct and *e[Is11]::GFP* are co-expressed in LMCm region.** (a) Representative images of the FLAG Cas9 expression marker and the medial LMC marker in *e[Is11]::GFP* in Control<sup>CRISPR</sup> and HD-PTP<sup>CRISPR</sup> sections of HH St. 25 ventral spinal cords.

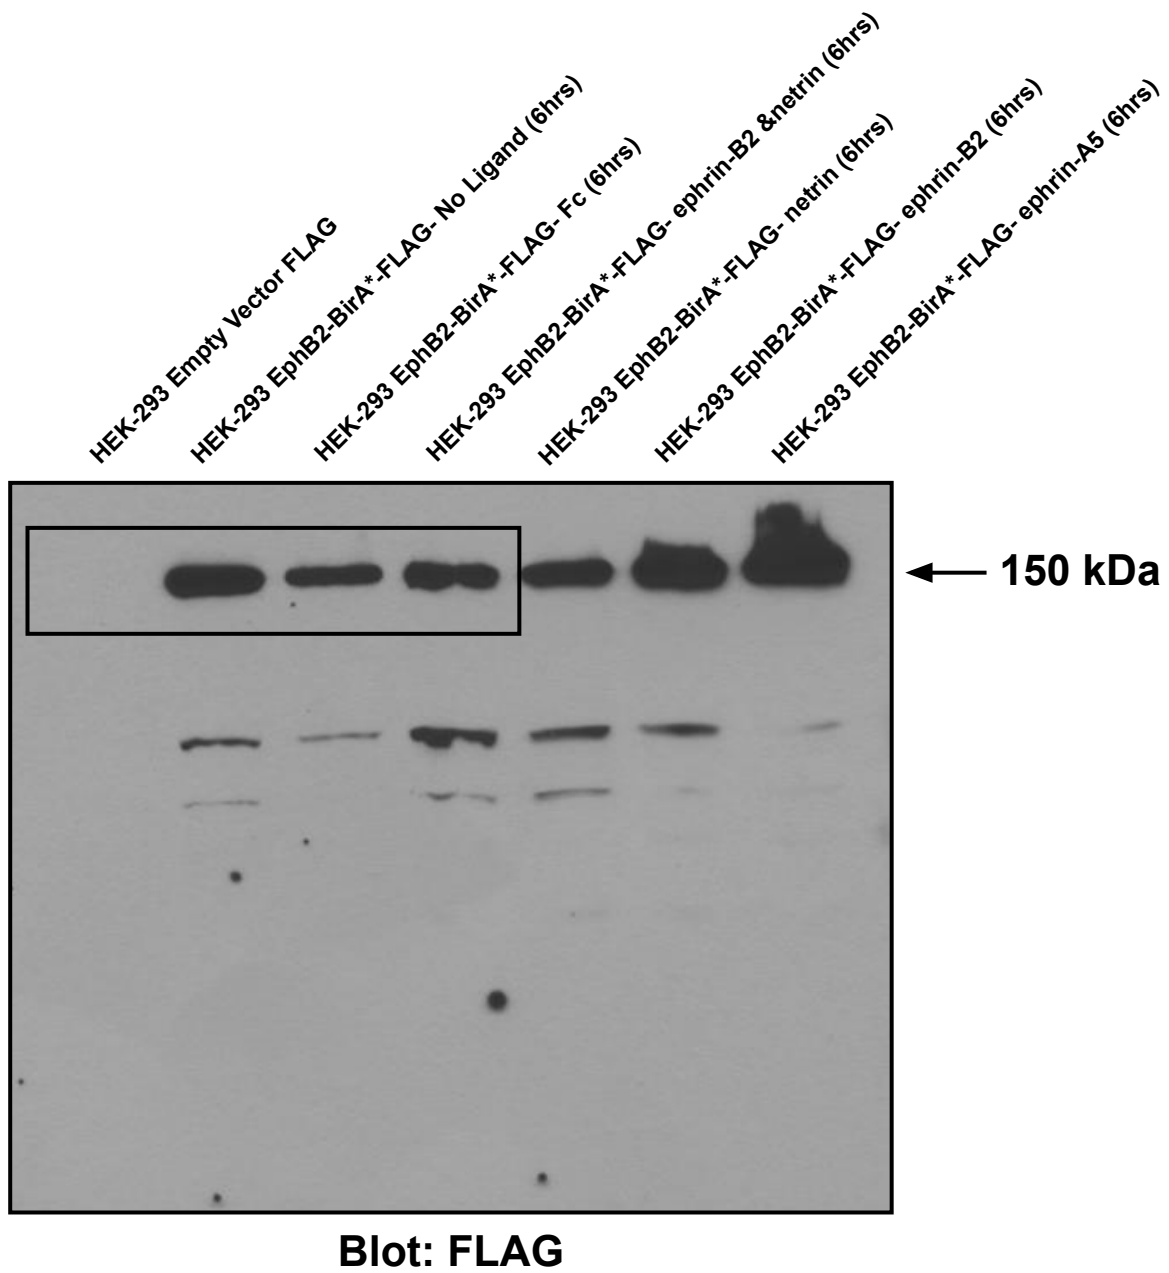

Supplementary Figure S6. Full Western blot in Figure 1b FLAG.

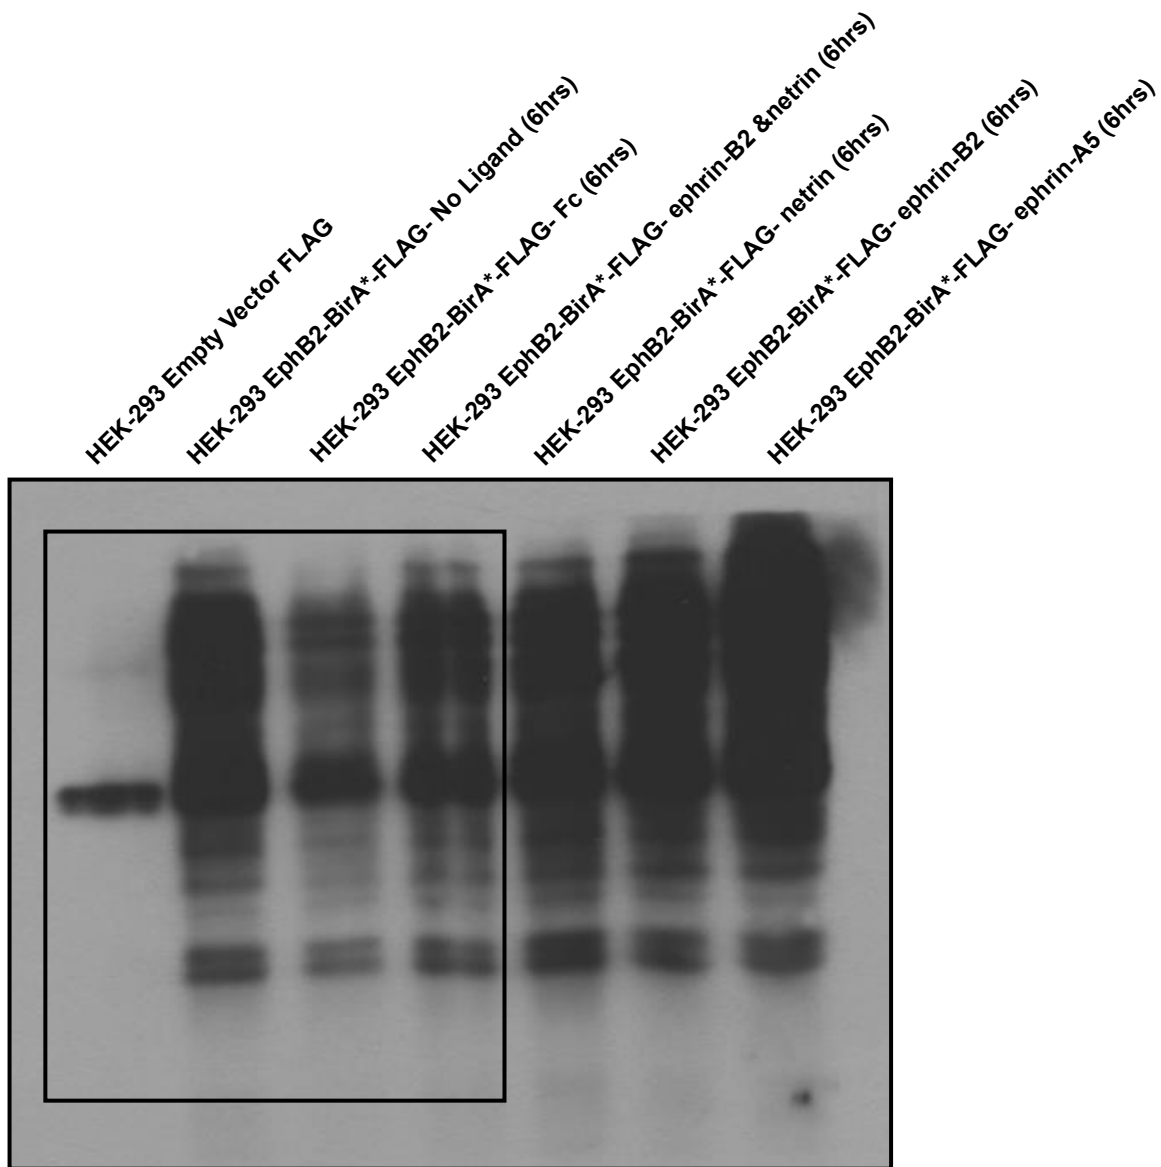

**Blot: Streptavidin**

**Supplementary Figure S7. Full Western blot in Figure 1b Streptavidin.**

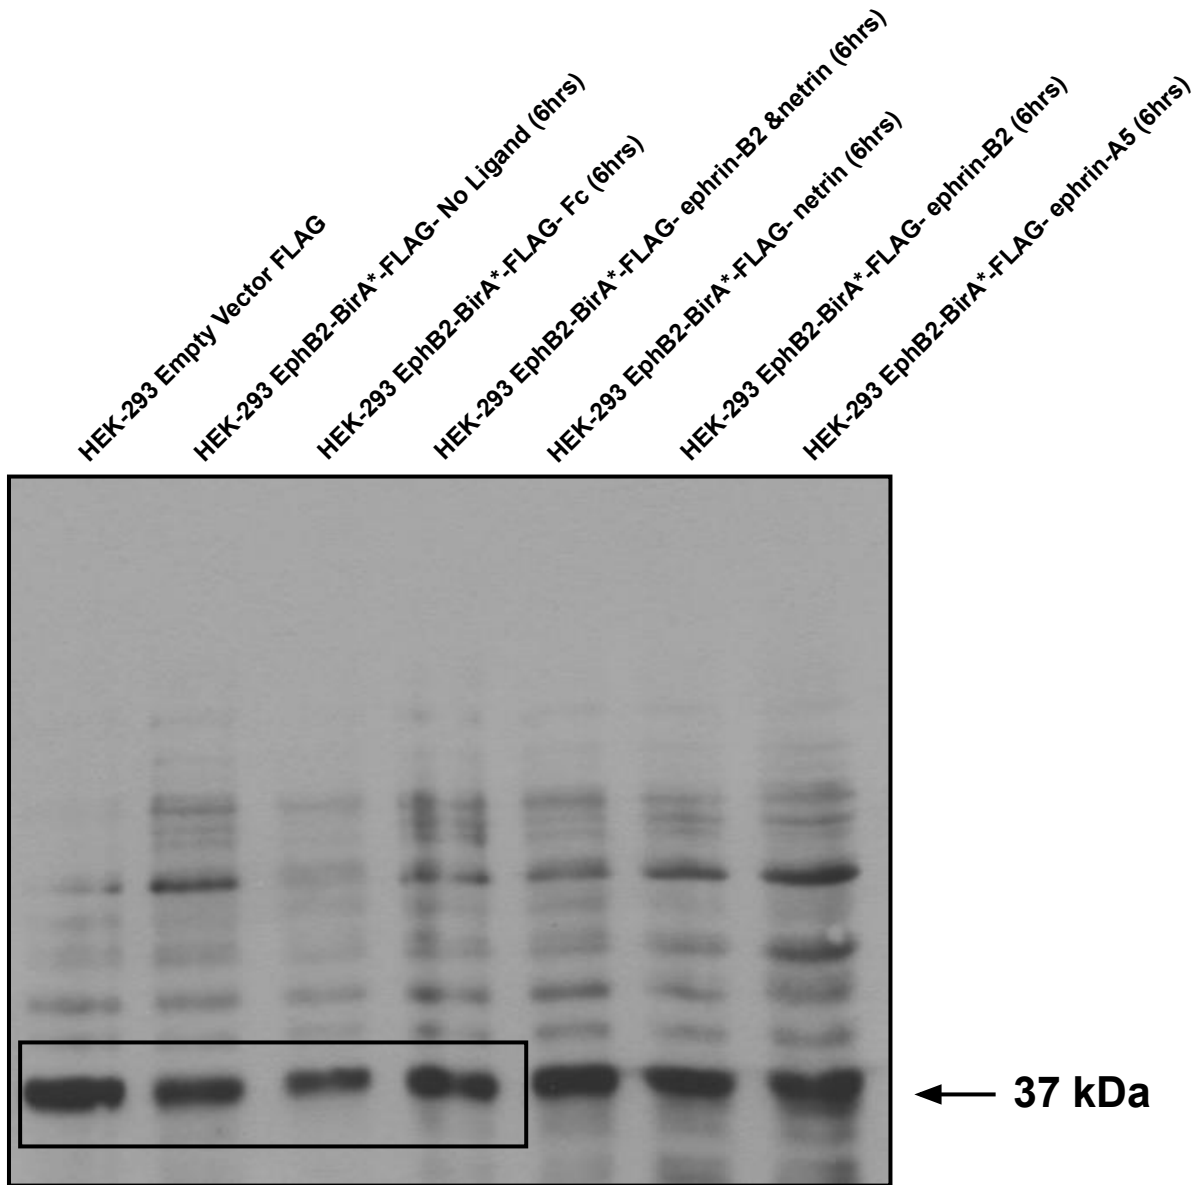

**Blot: GAPDH**

**Supplementary Figure S8. Full Western blot in Figure 1b GAPDH.**

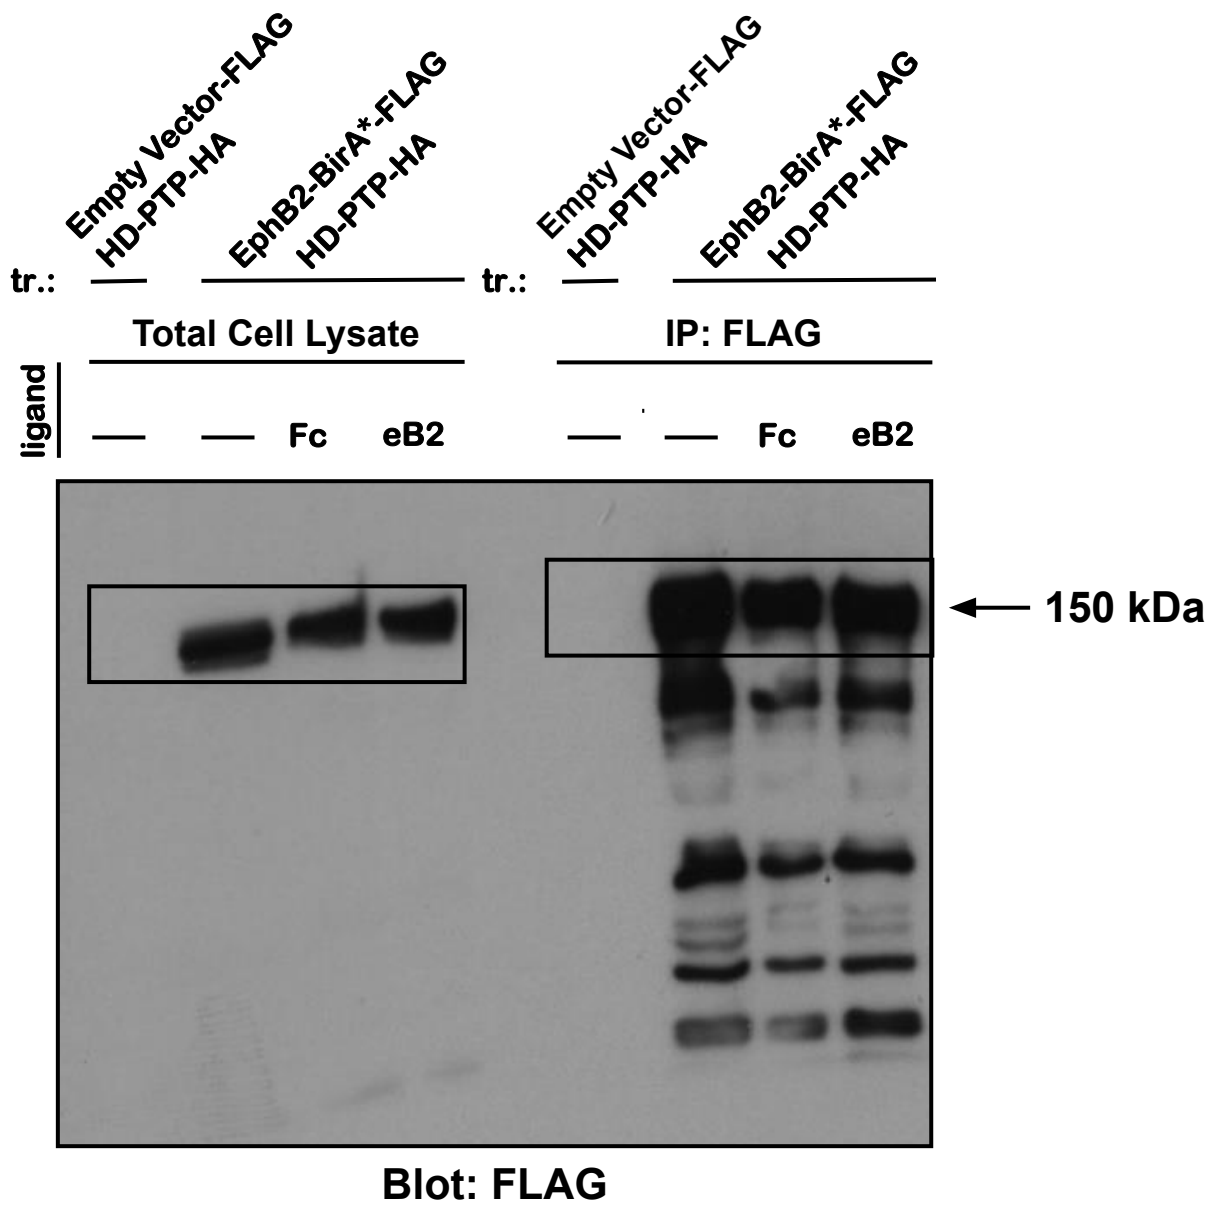

Supplementary Figure S9. Full Western blot in Figure 2a and Supplementary Figure S1a FLAG.

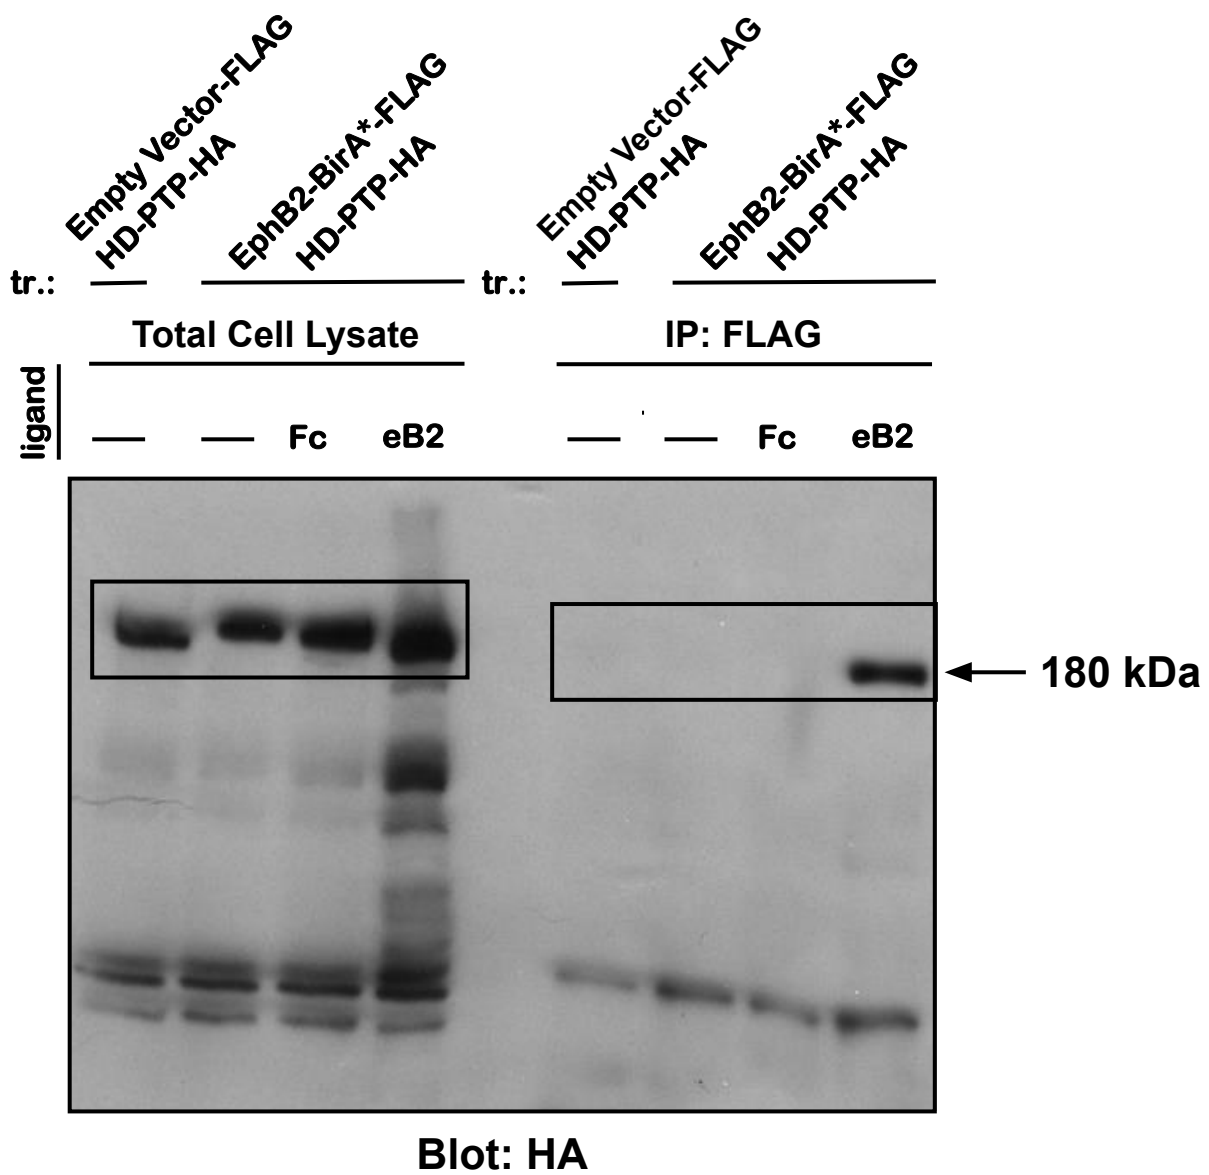

Supplementary Figure S10. Full Western blot in Figure 2a and Supplementary Figure S1c.

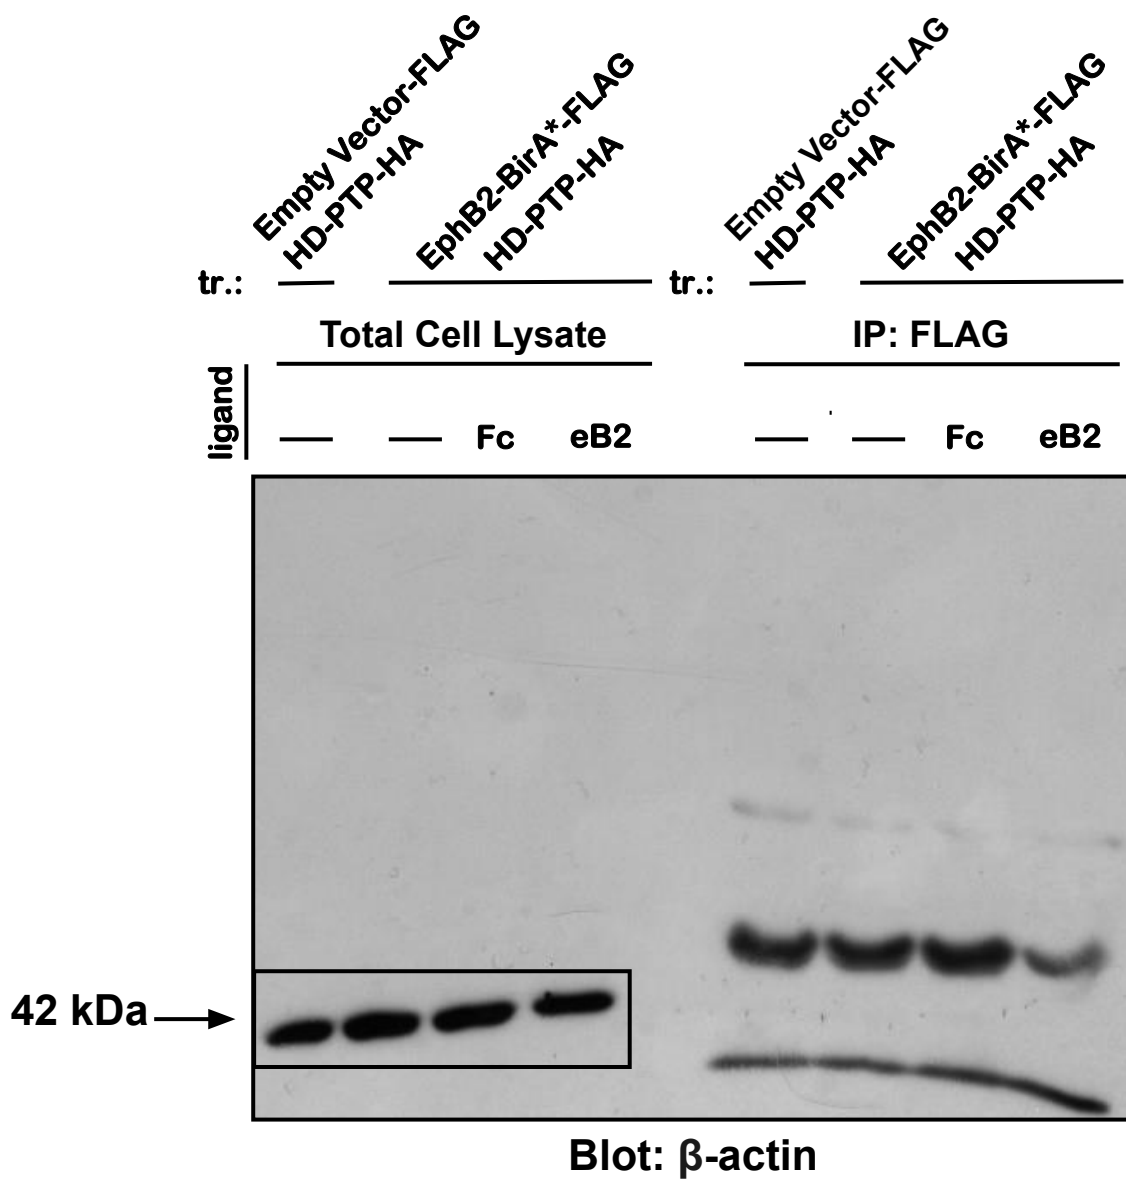

Supplementary Figure S11. Full Western blot in Supplementary Figure S1a beta-actin corresponding to the FLAG blot.

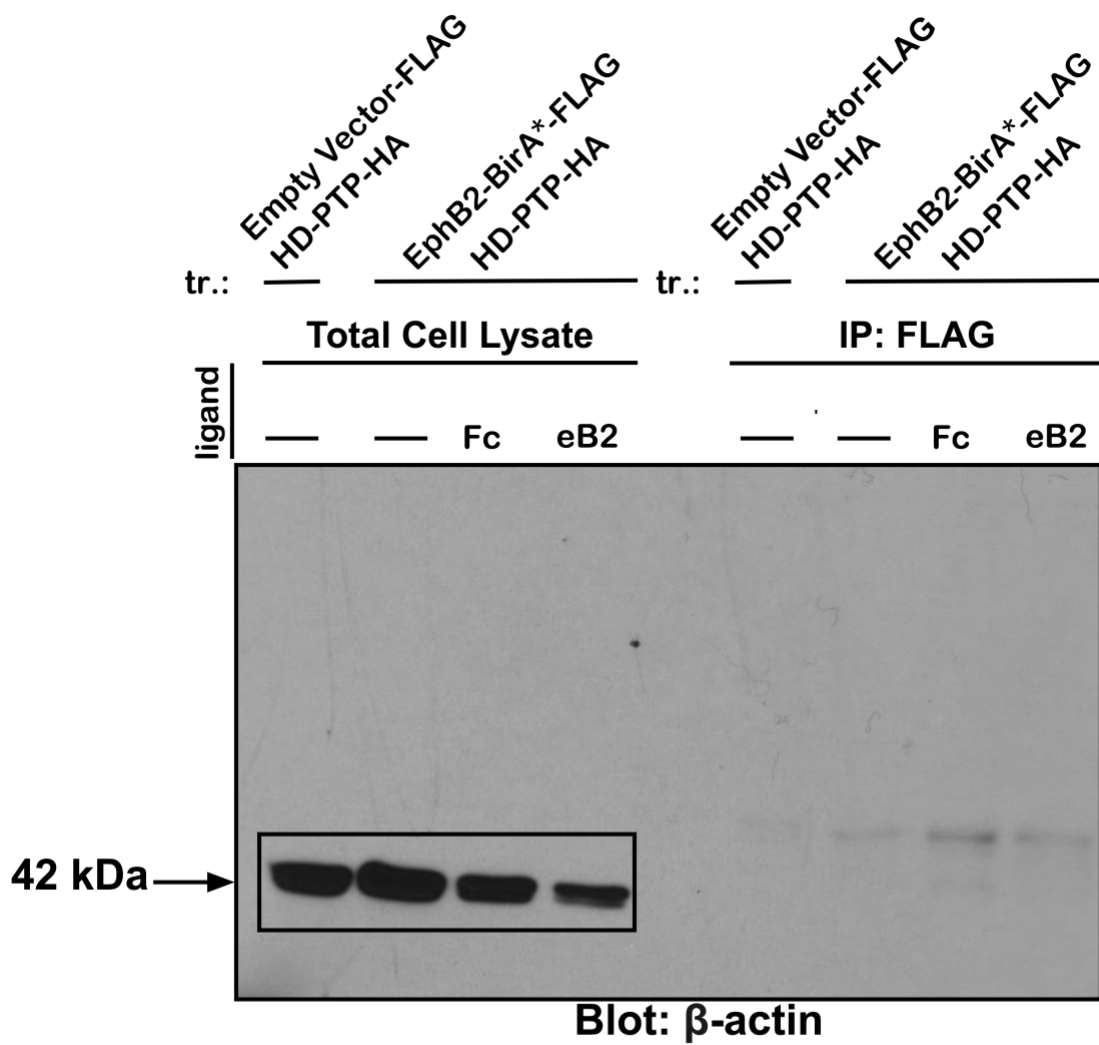

Supplementary Figure S12. Full Western blot in Supplementary Figure S1c beta-actin corresponding to the HA blot.



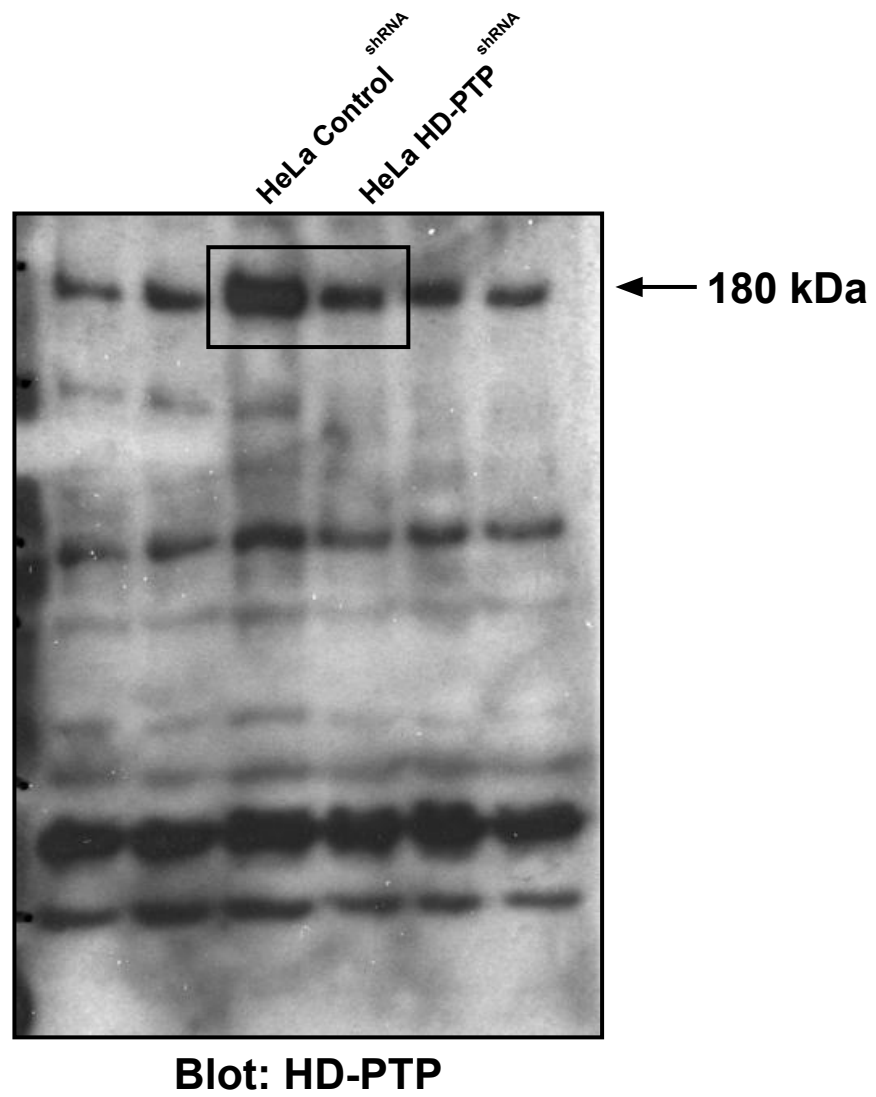

Supplementary Figure S13. Full Western blot in Supplementary Figure S1f HD-PTP.

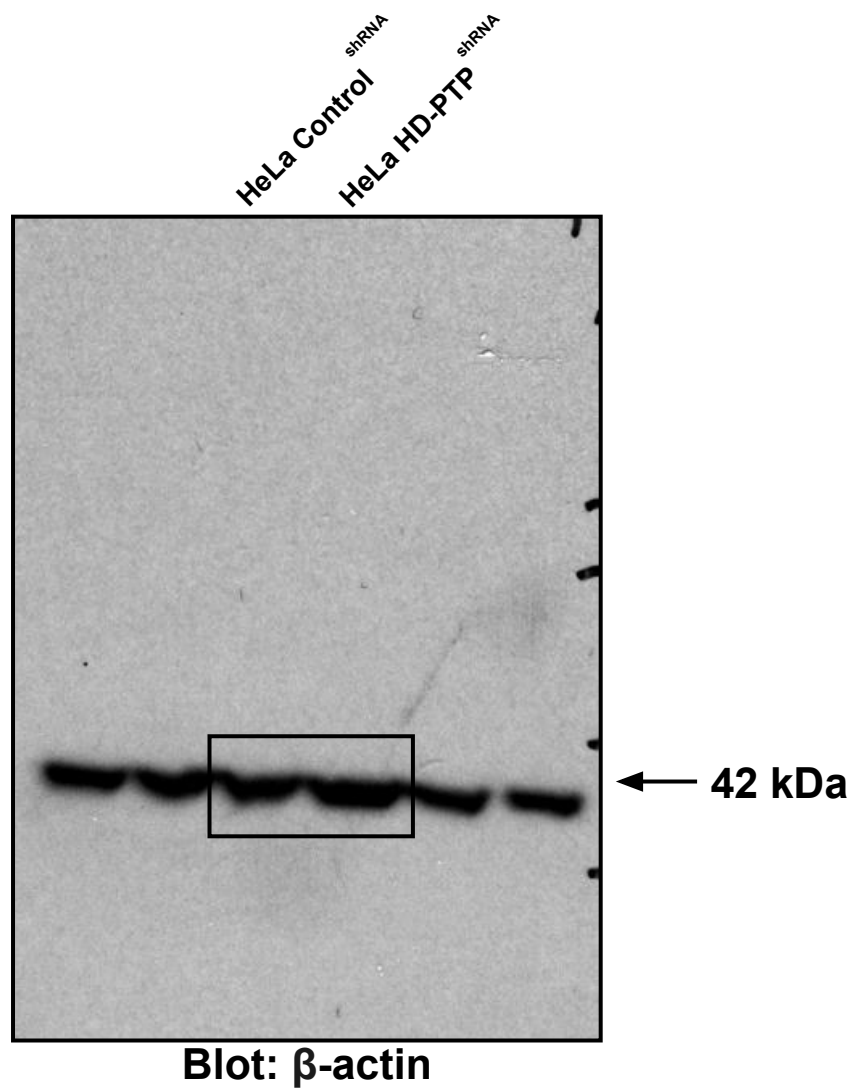

Supplementary Figure S14. Full Western blot in Supplementary Figure S1f Beta-actin.

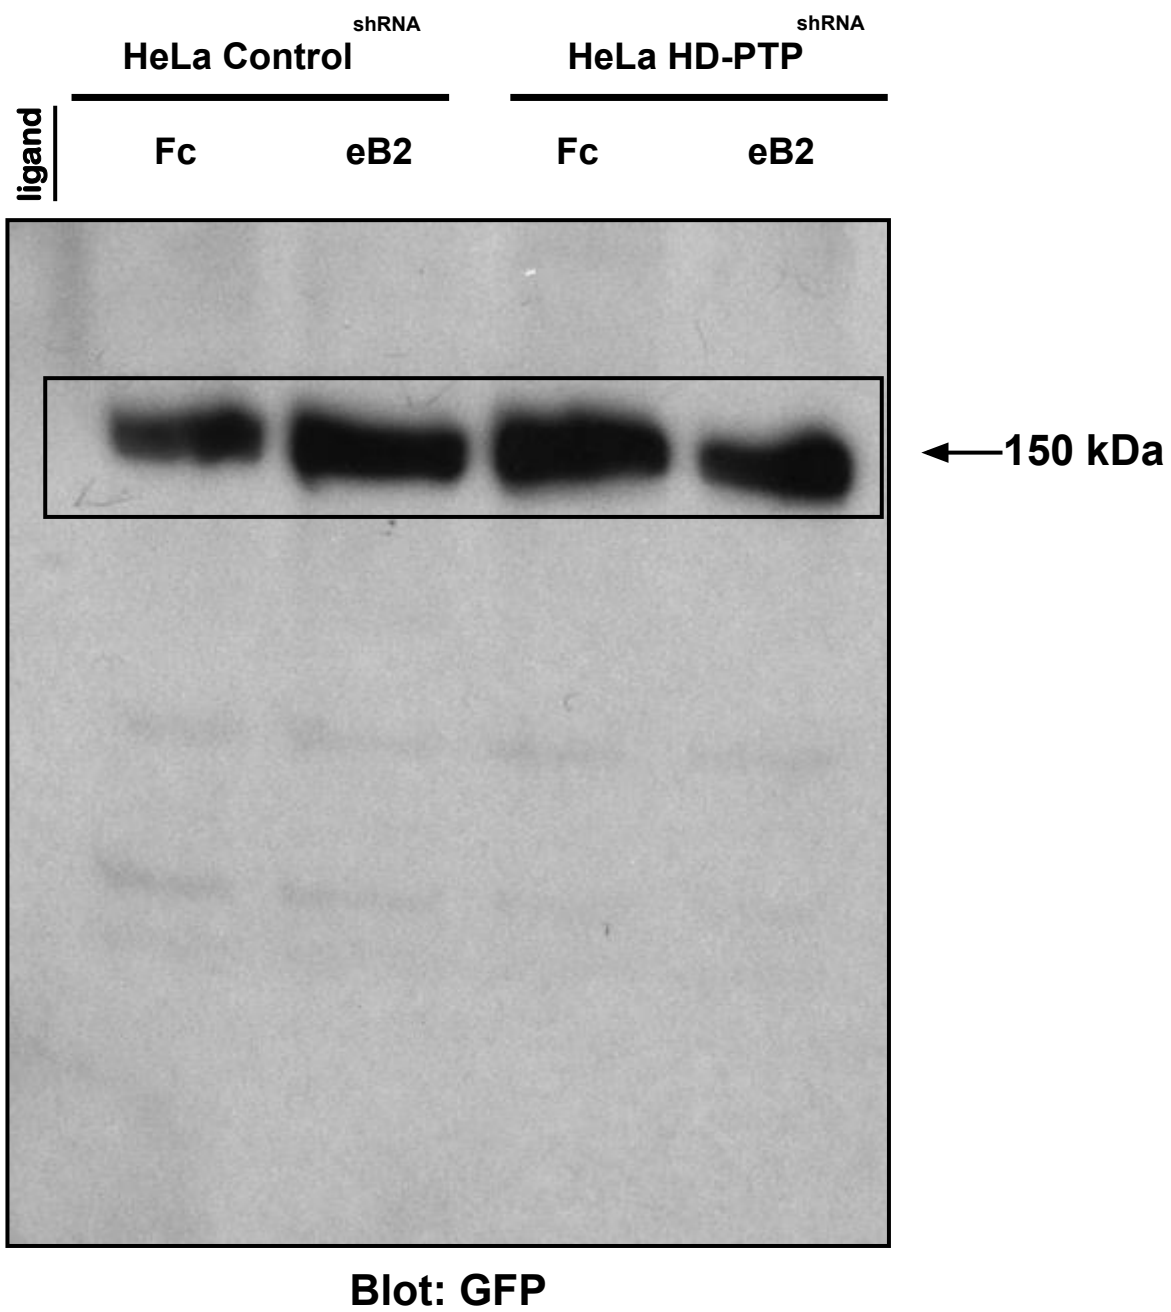

Supplementary Figure S15. Full Western blot in Supplementary Figure S4a GFP.

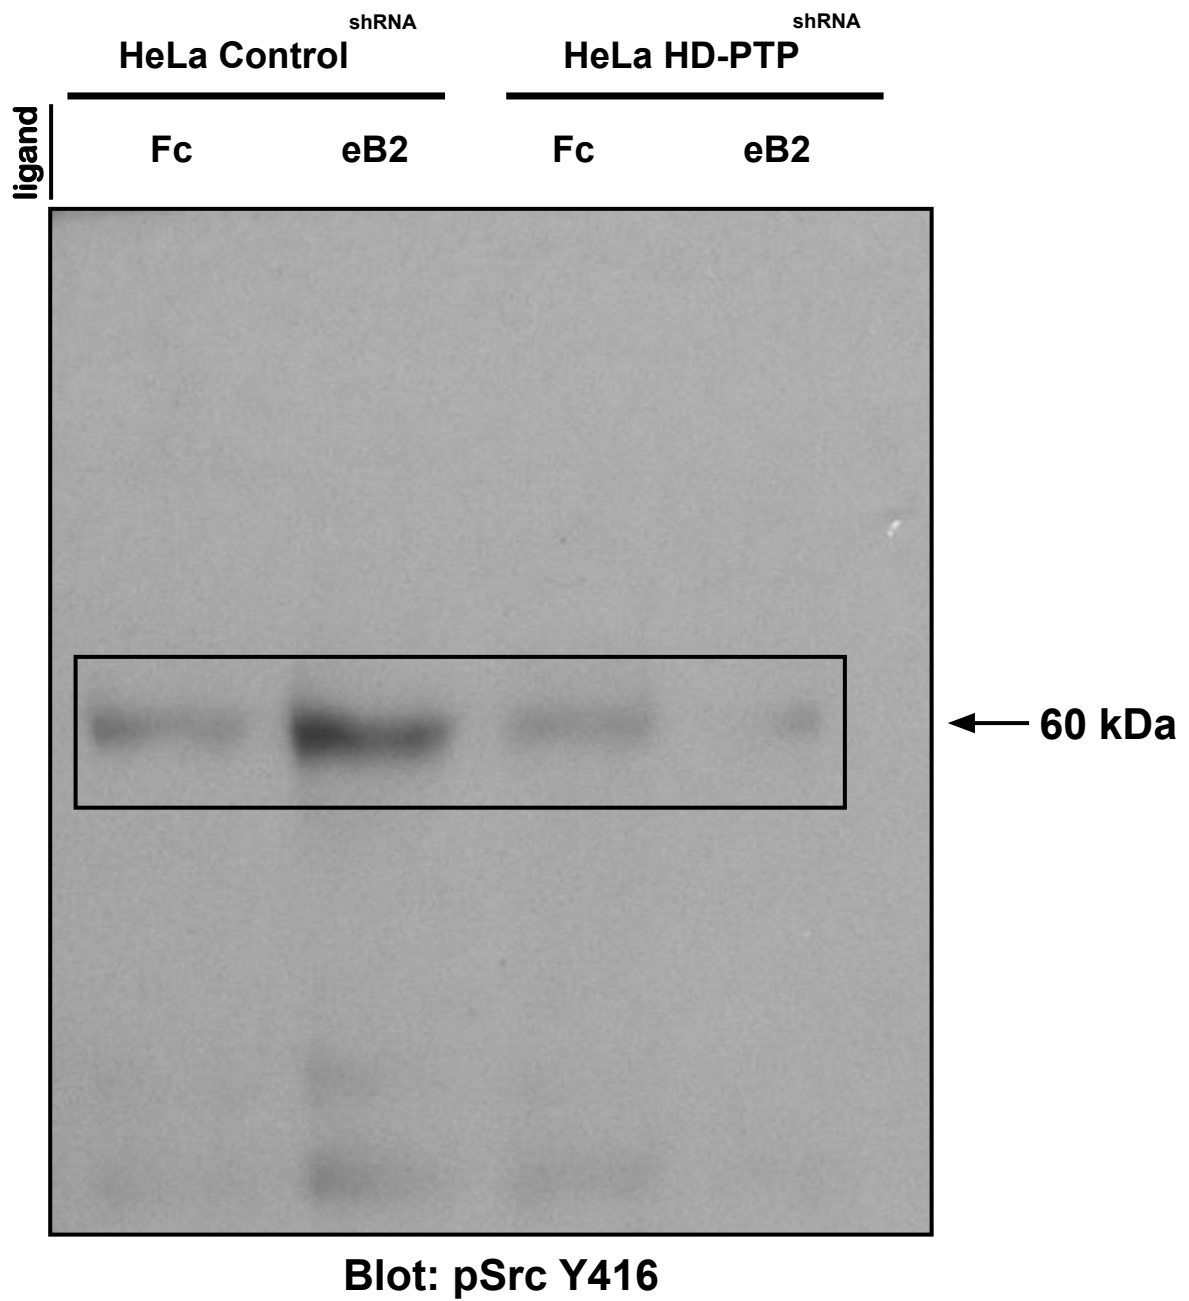

Supplementary Figure S16. Full Western blot in Supplementary Figure S4e Phospho-Src-Y416.

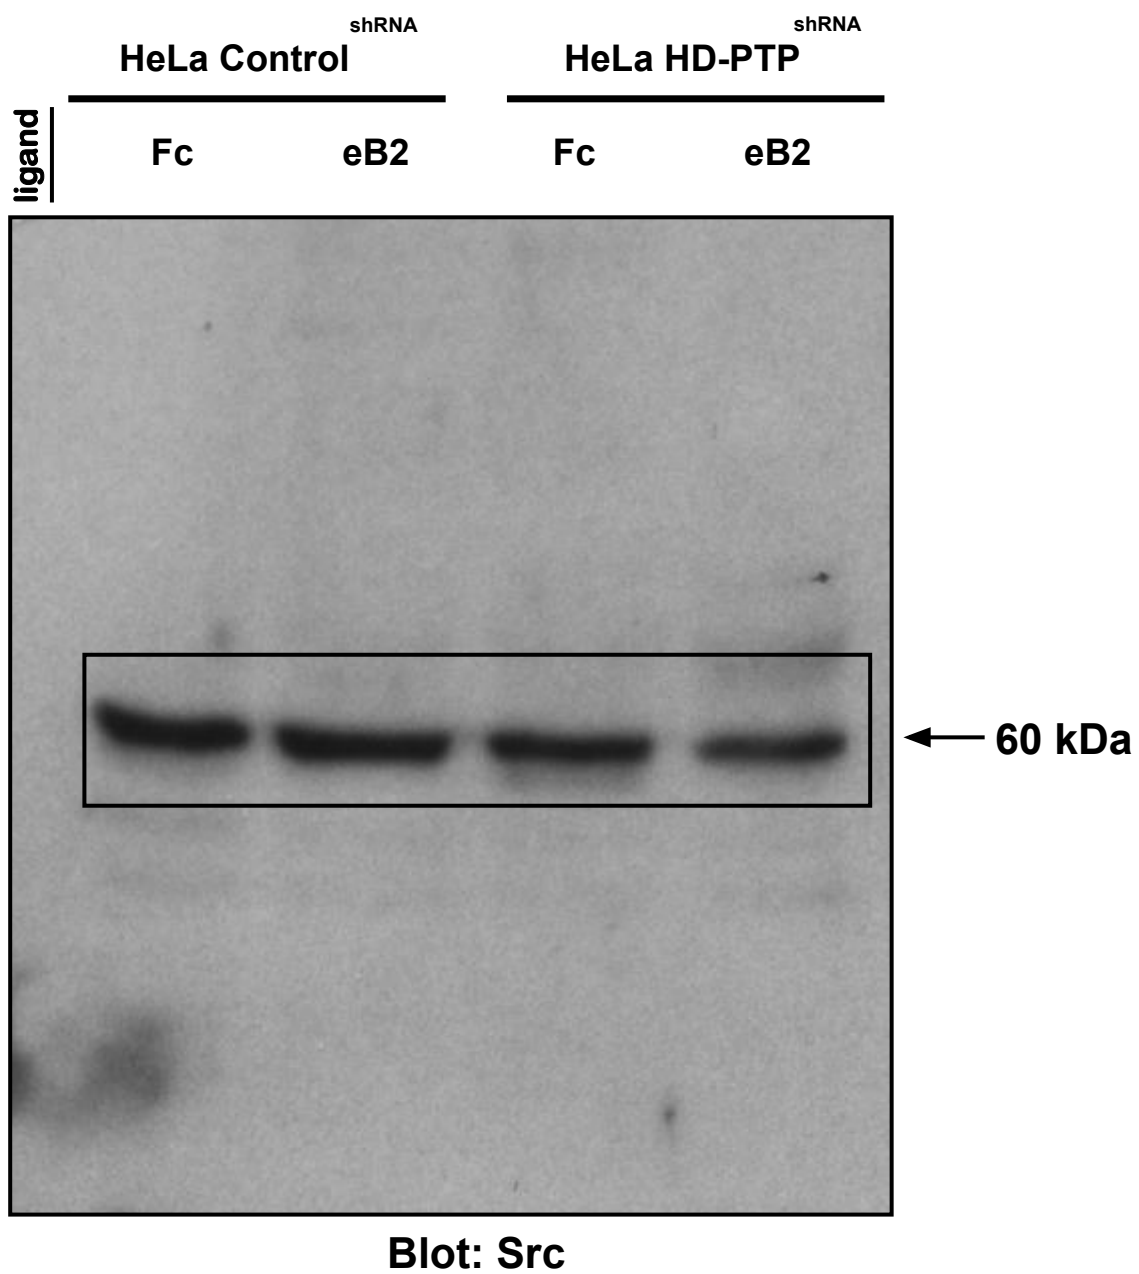

**Supplementary Figure S17. Full Western blot in Supplementary Figure S4e Src.**

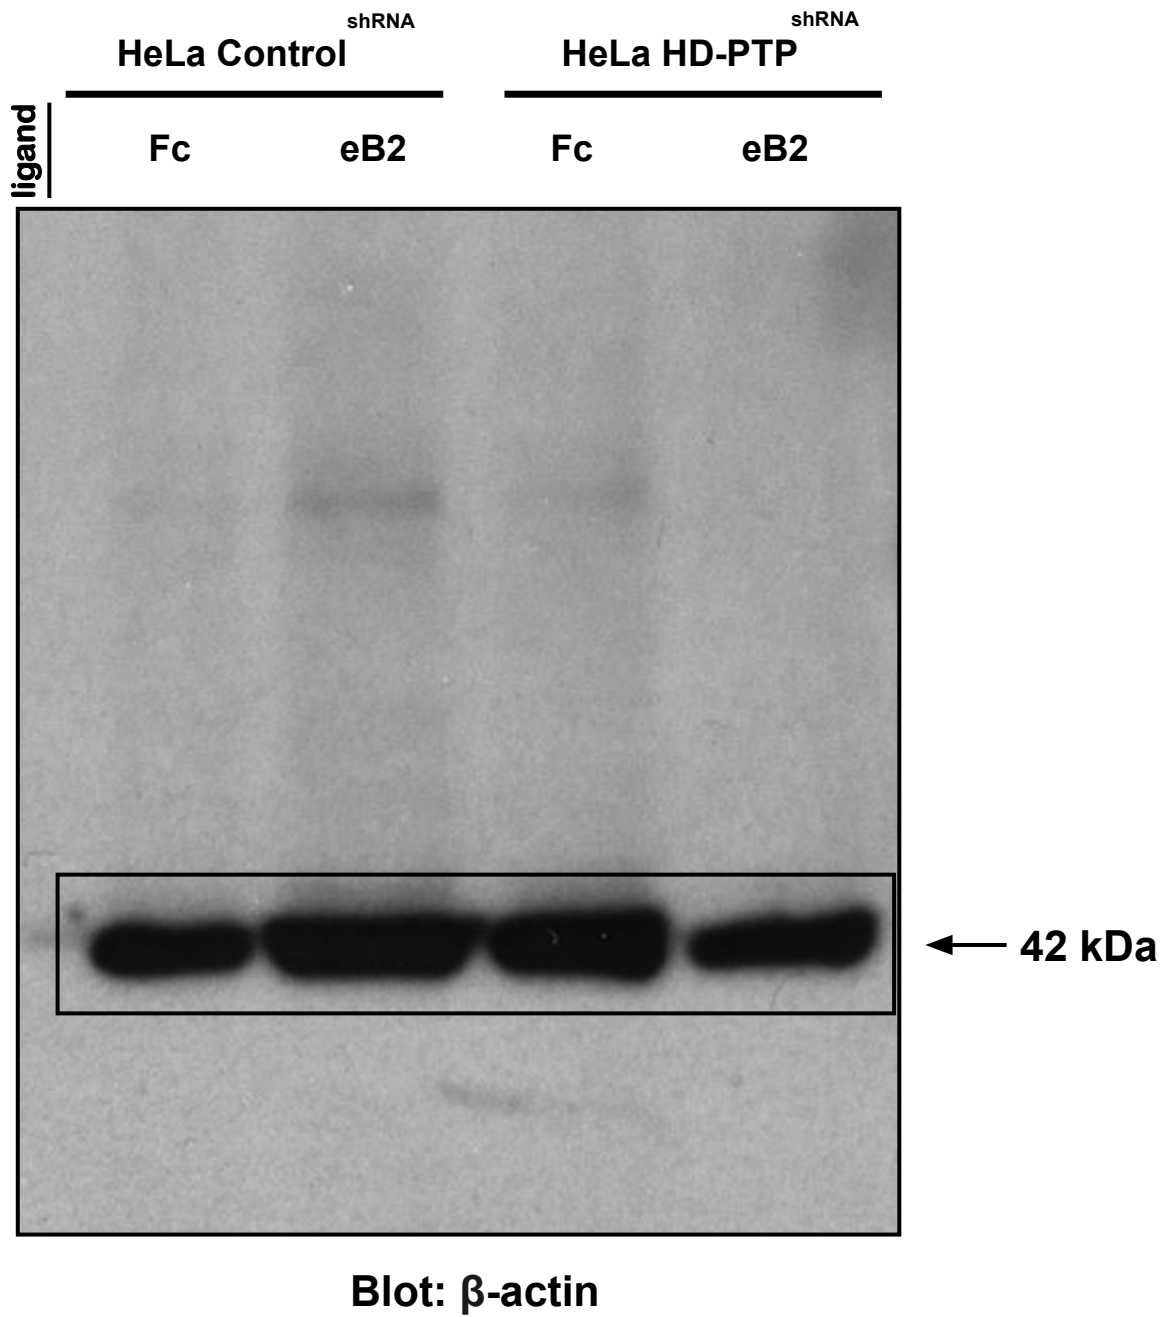

Supplementary Figure S18. Full Western blot in Supplementary Figure S4e Beta-actin corresponding to phospho-SRC Y416 blot.

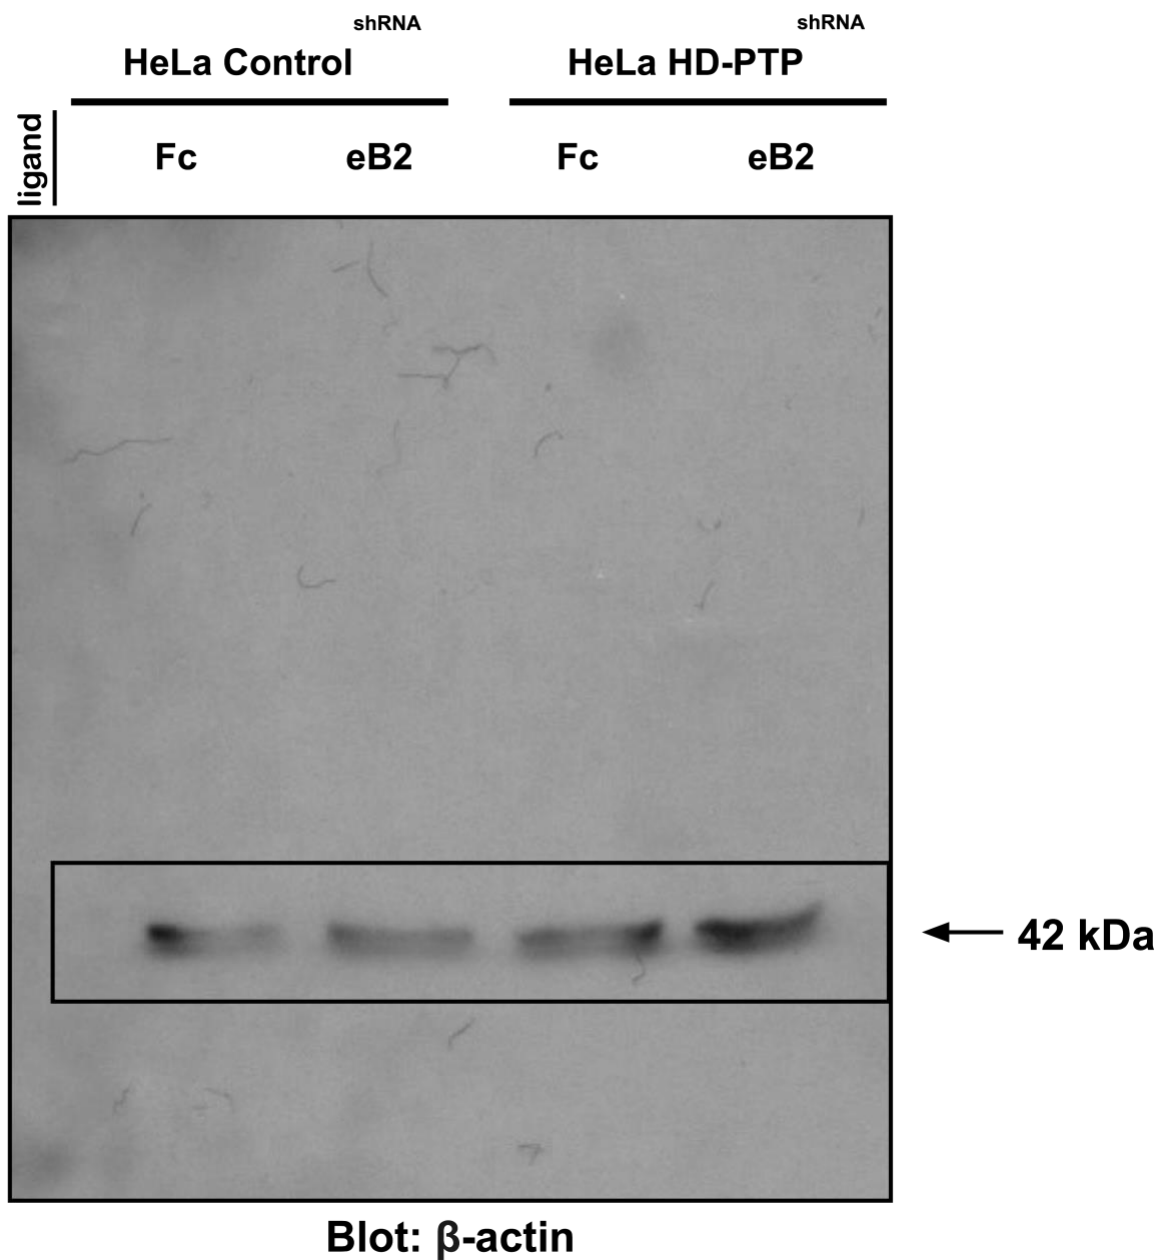

**Supplementary Figure S19. Full Western blot in Supplementary Figure S4a Beta-actin corresponding to Src and GFP blot.**

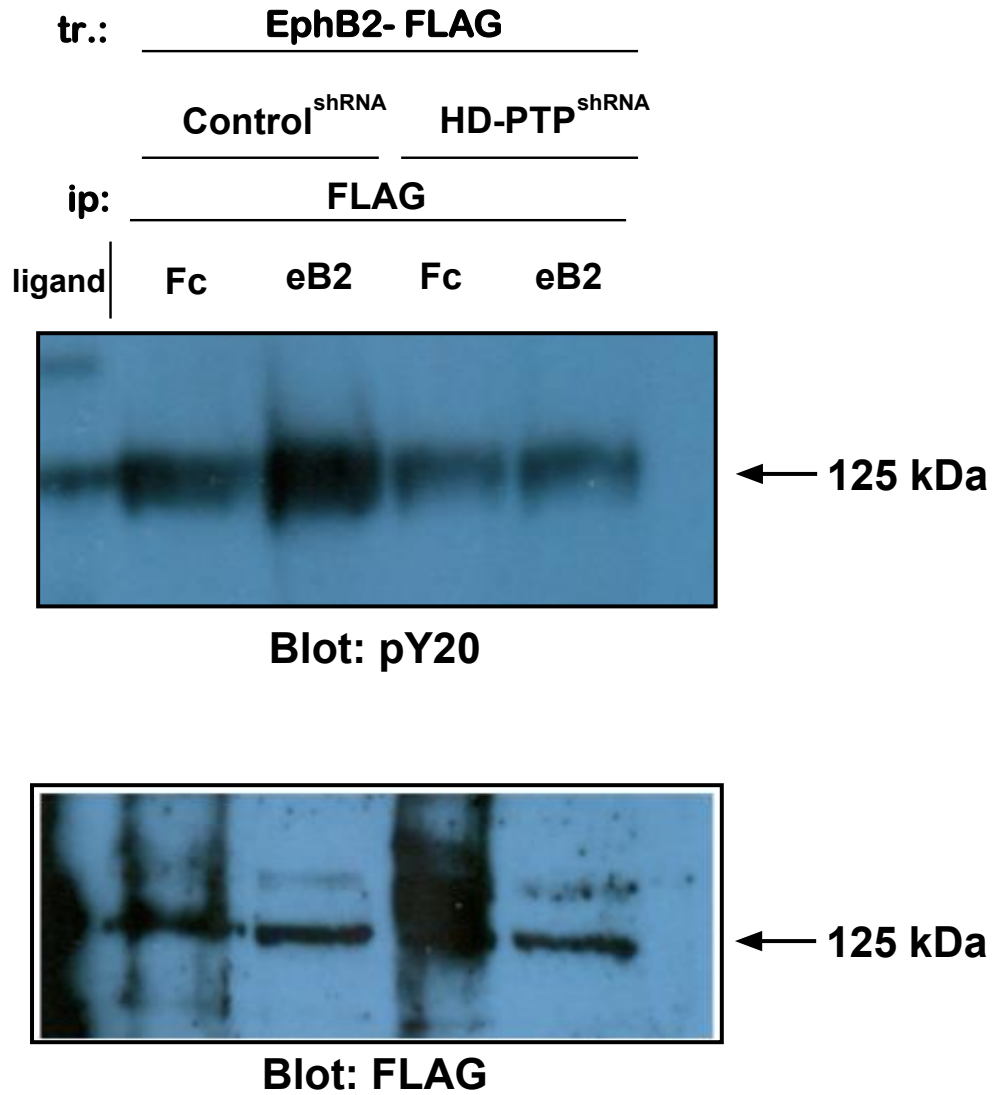

**Supplementary Figure S20. Western blot in Figure 6g pY20 and FLAG. The membranes for this experiment were cut.**



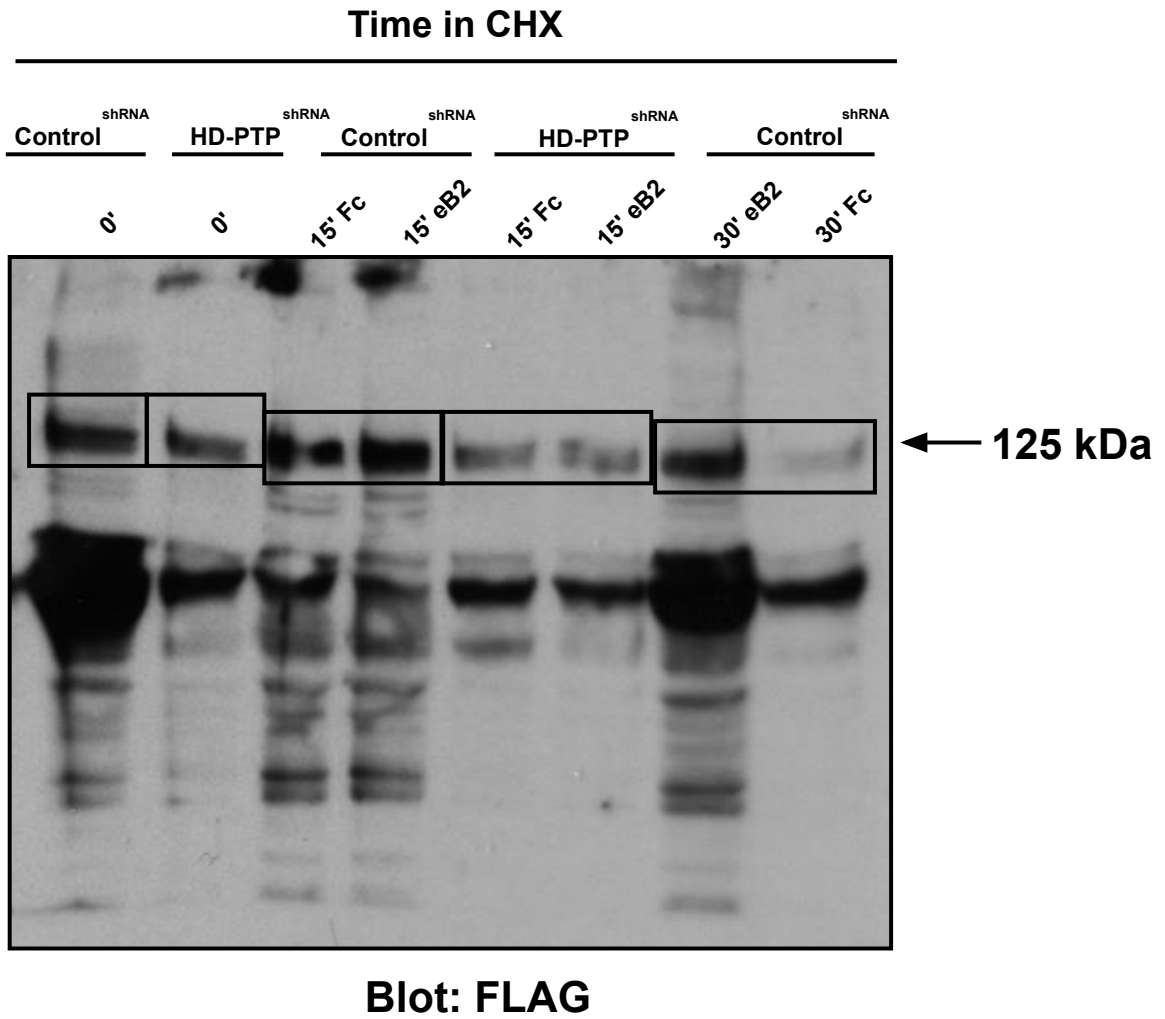

**Supplementary Figure S21. Full Western blot in Figure 7e,g FLAG.**

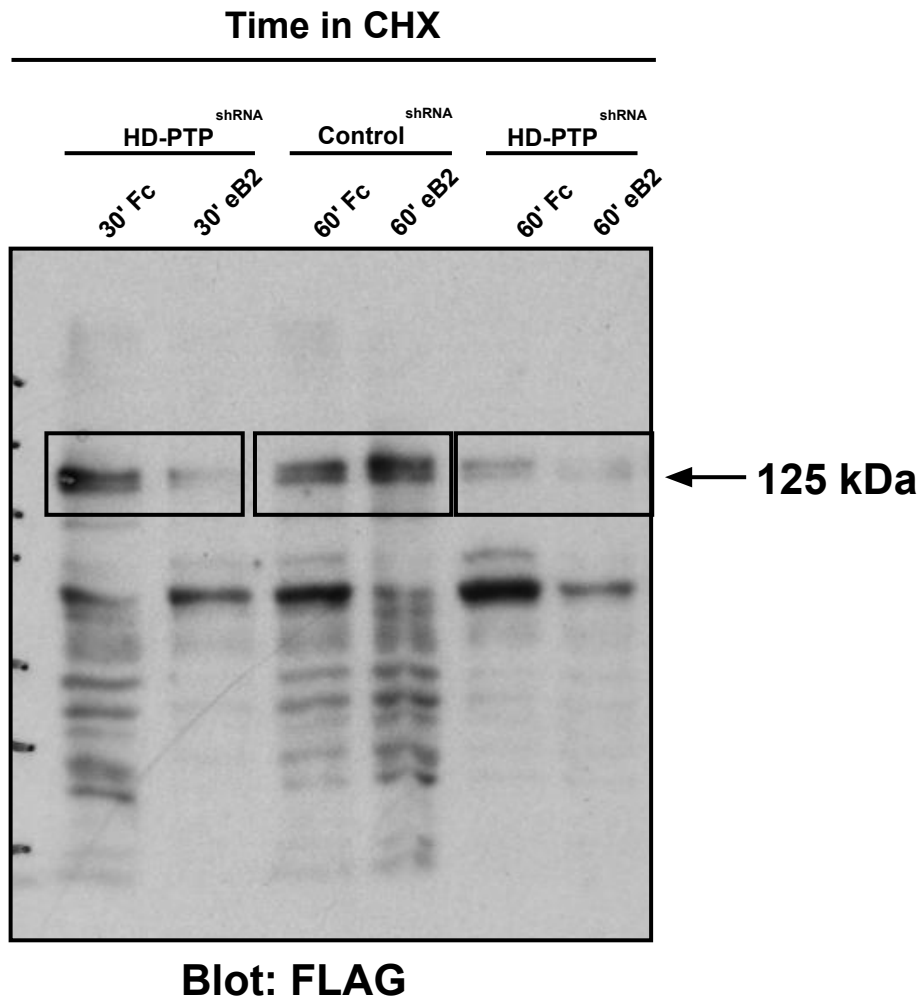

**Supplementary Figure S22. Full Western blot in Figure 7e,g FLAG.**

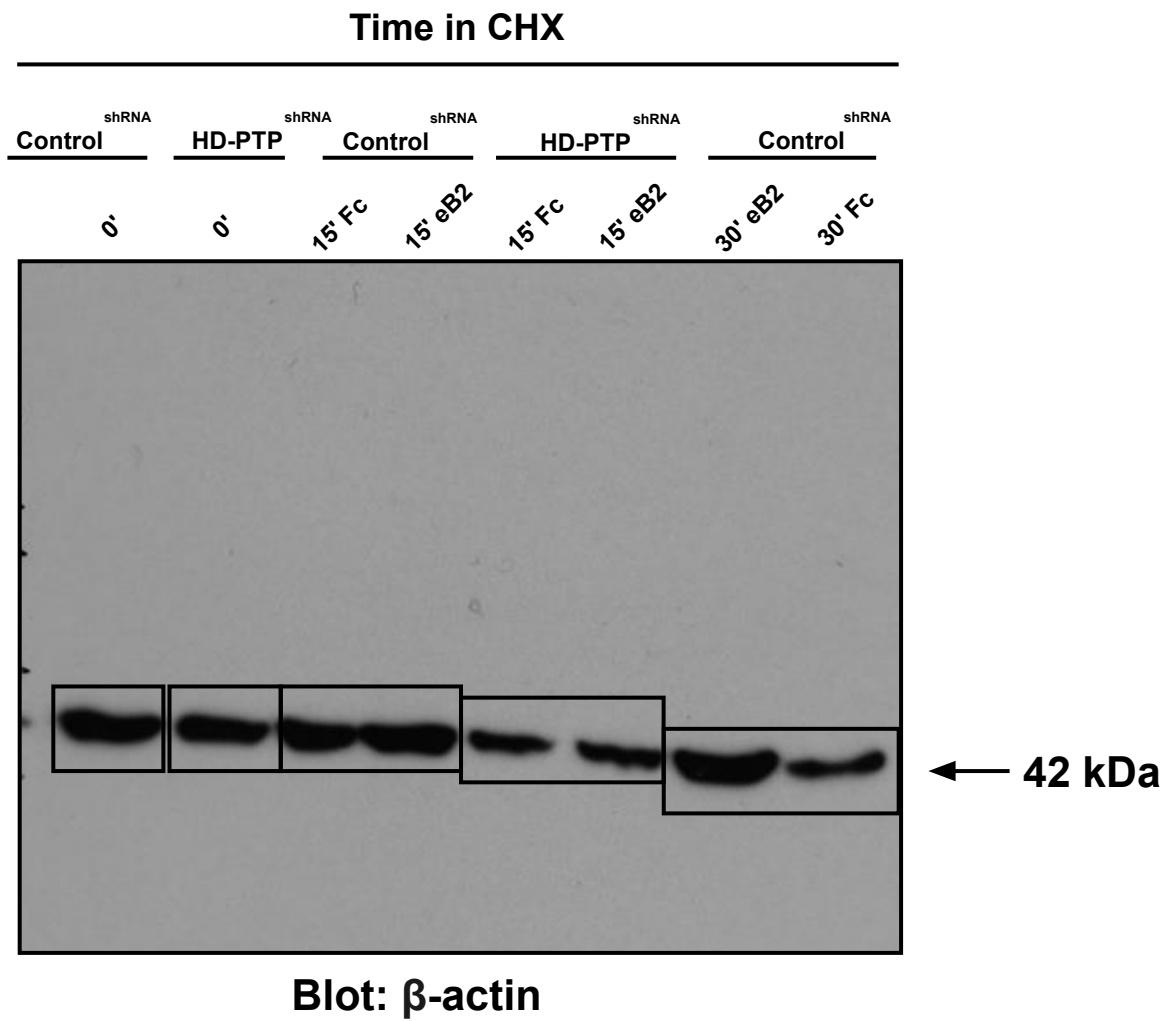

Supplementary Figure S23. Full Western blot in Figure 7e,g Beta-actin.

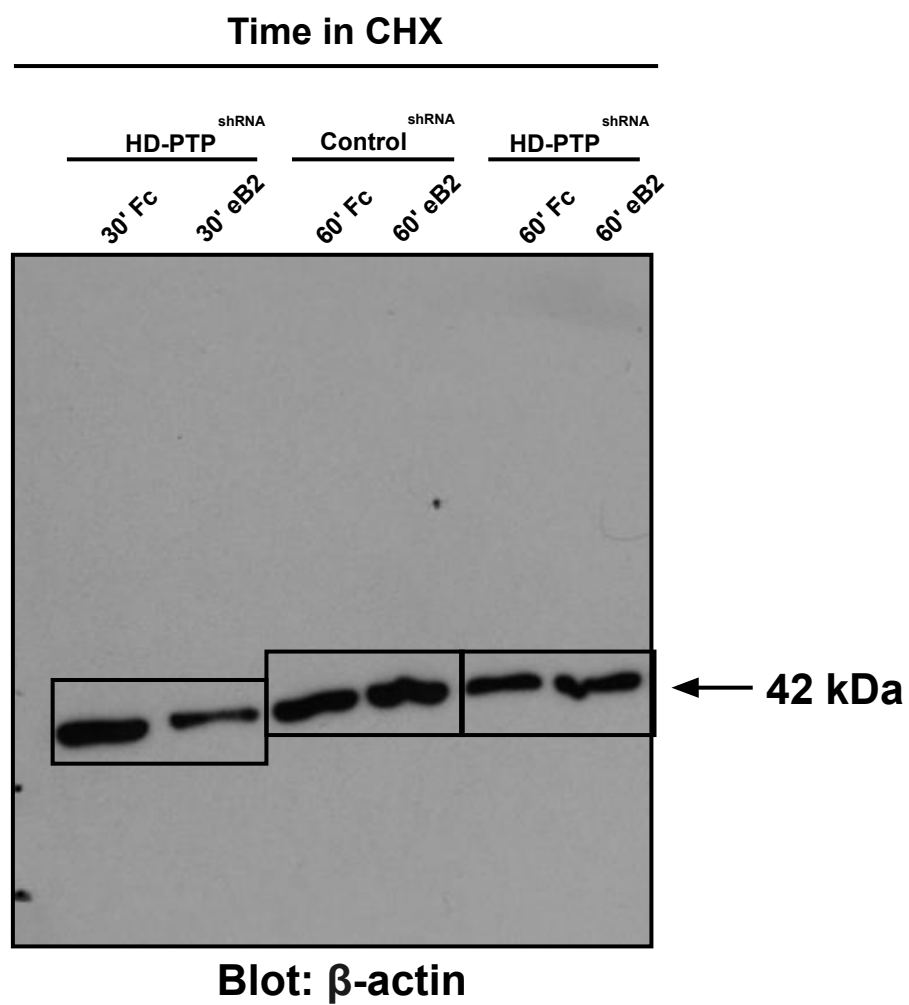

**Supplementary Figure S24. Full Western blot in Figure 7e,g Beta-actin.**

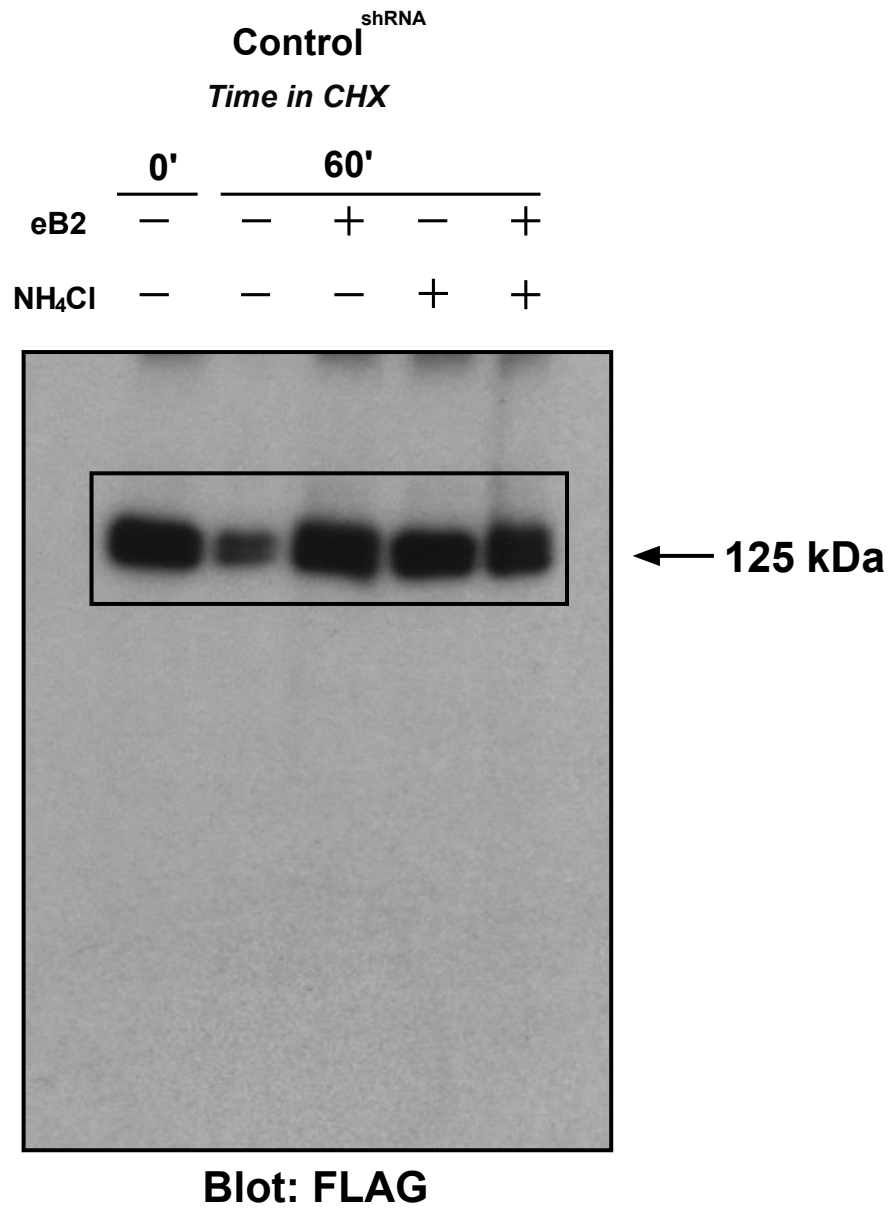

Supplementary Figure S25. Full Western blot in Figure 7i FLAG.

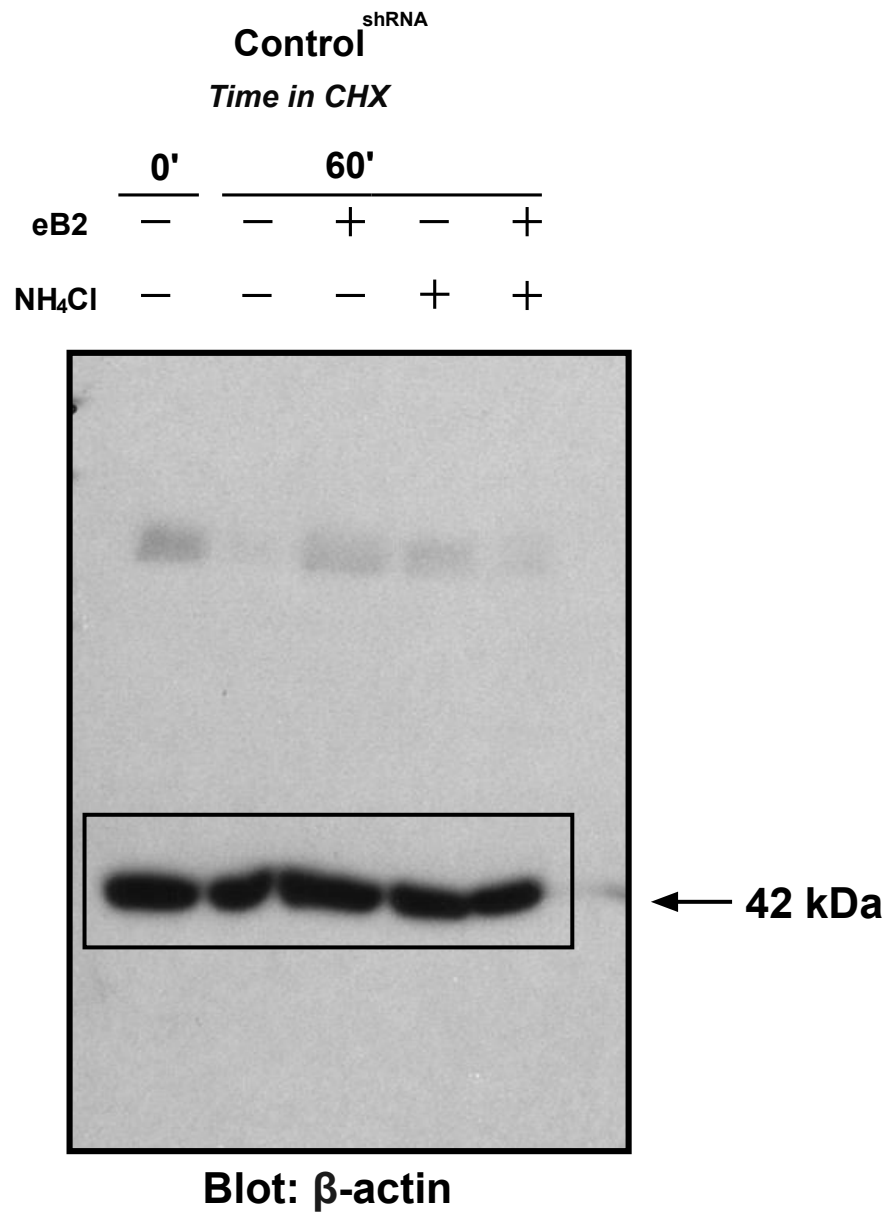

Supplementary Figure S26. Full Western blot in Figure 7i Beta-actin.

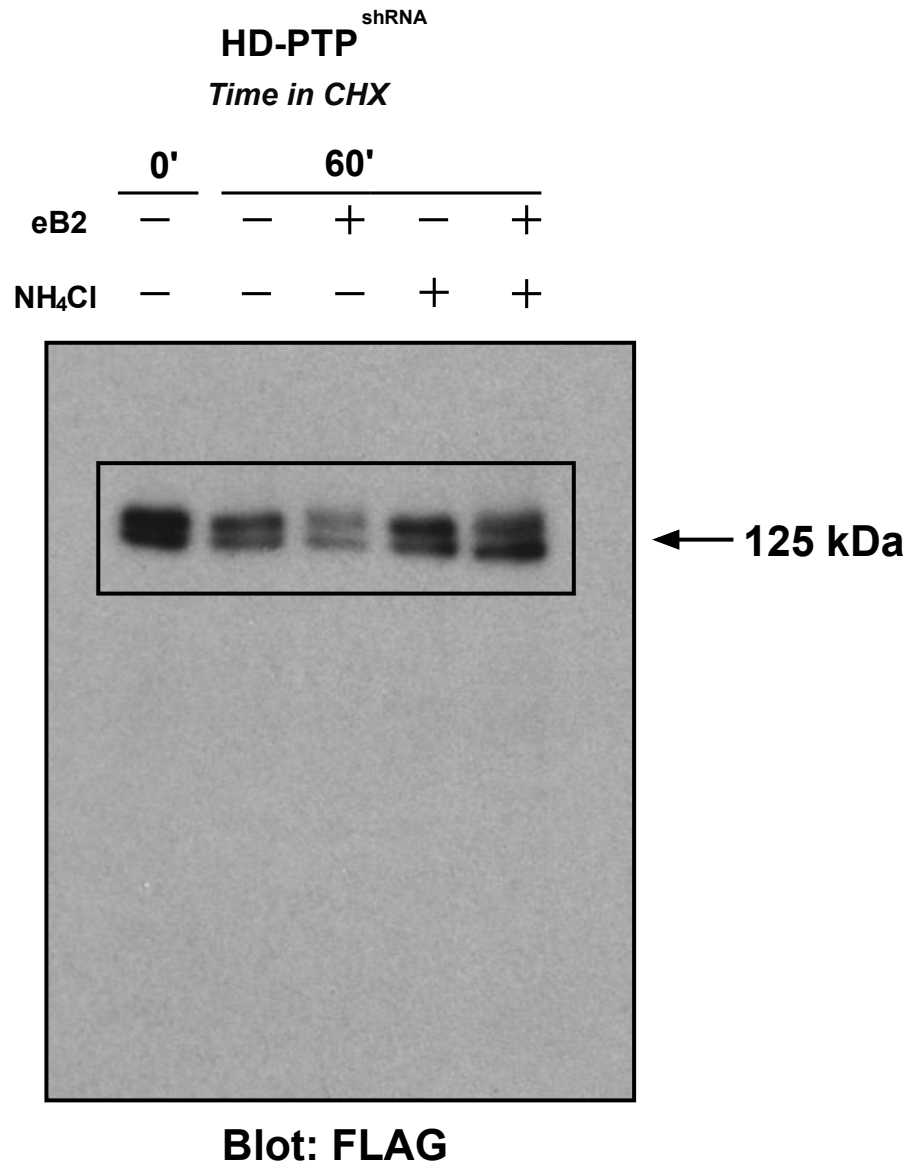

**Supplementary Figure S27. Full Western blot in Figure 7k FLAG.**

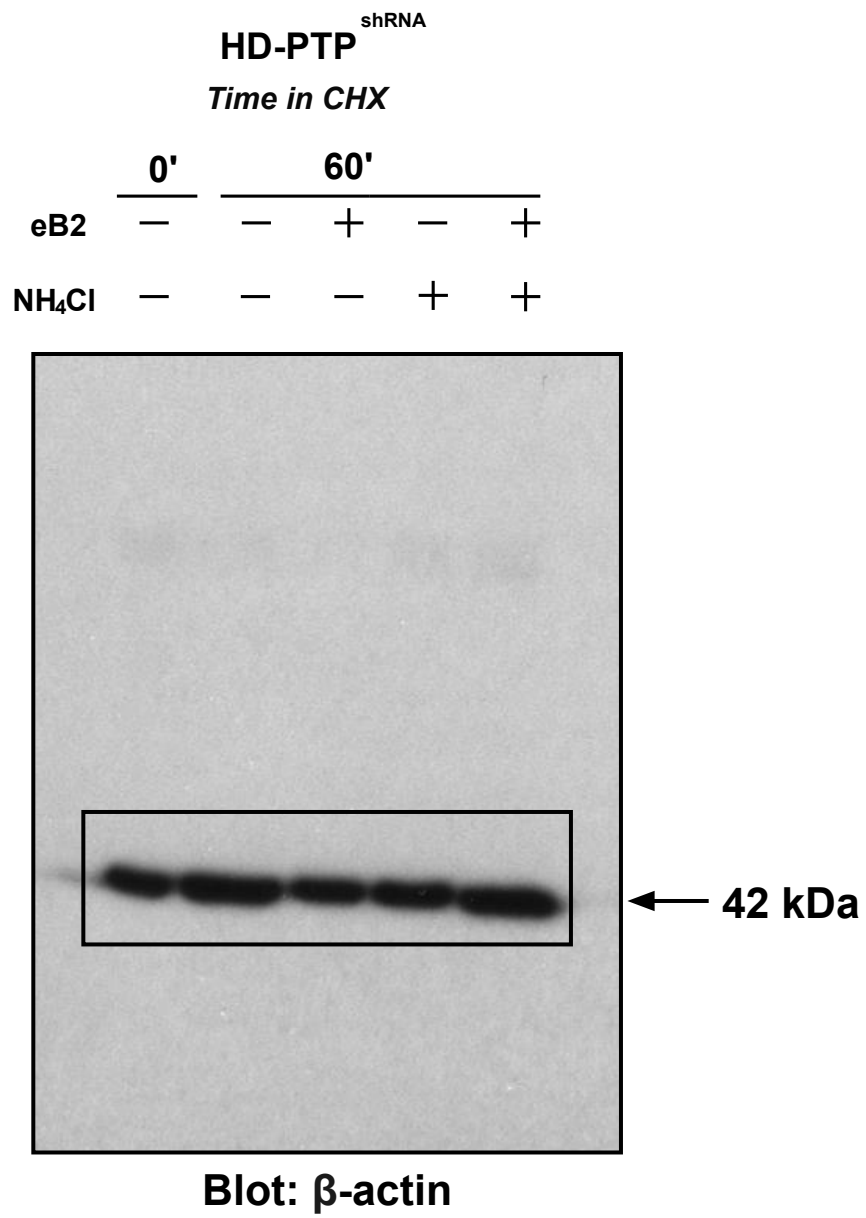

**Supplementary Figure S28. Full Western blot in Figure 7k Beta-actin.**



## Supplementary Tables

Supplementary Table S1: Antibodies and reagents used.

| Antigen/<br>recombinant protein | Source Species | Dilution /<br>concentration                                        | Source/reference  |
|---------------------------------|----------------|--------------------------------------------------------------------|-------------------|
| Foxp1                           | Rabbit         | 1:1000                                                             | Abcam             |
| Isl1                            | Mouse          | 1:100                                                              | DSHB              |
| GFP                             | Rabbit         | 1:1000                                                             | Invitrogen        |
| Ephrin-B2-Fc                    | Mouse          | CoIP = 1.5 µg/mL<br>HeLa = 1.0 µg/mL<br>Growth Cones = 10<br>µg/mL | R&D systems       |
| Sema3A-Fc                       | Human          | 300 ng/mL                                                          | R&D Systems       |
| Sema3F-Fc                       | Mouse          | 300 ng/mL                                                          | R&D Systems       |
| Fc                              | Human          | Matched with ephrin-<br>B2 and Sema<br>concentrations.             | R&D Systems       |
| EphB2                           | Goat           | 1:1000                                                             | R&D Systems       |
| EEA1                            | Rabbit         | 1:1000                                                             | Abcam             |
| Anti-Fc                         | Goat           | 1:4 mass ratio to<br>ephrin-B2                                     | Sigma Aldrich     |
| Anti-Fc                         | Mouse          | 1:4 mass ratio to<br>ephrin-B2                                     | Sigma Aldrich     |
| Tuj1                            | Mouse          | 1:1000                                                             | Covance           |
| 568-Phalloidin                  |                | 1:500                                                              | Life Technologies |
| HA                              | Mouse          | 1:2000                                                             | Sigma Aldrich     |
| Flag                            | Mouse          | 1:200                                                              | Sigma Aldrich     |
| Flag-HRP                        | Mouse          | 1:8000                                                             | Sigma Aldrich     |
| Beta-actin                      | Mouse          | 1:5000                                                             | Sigma Aldrich     |
| HD-PTP                          | Rabbit         | 1:2000 (WB)<br>1:200 (IF)                                          | <sup>83</sup>     |
| Phosphotyrosine Y20             | Mouse          | 1:2000                                                             | BD Biosciences    |
| phospho-Y418-SFK                | Rabbit         | 1:500                                                              | Life Technologies |
| Streptavidin-HRP                | Mouse          | 1:25000                                                            | Sigma Aldrich     |
| pSrc-Y416                       | Rabbit         | 1:1000                                                             | Cell Signaling    |
| Src                             | Mouse          | 1:2000                                                             | Cell Signaling    |
| GAPDH-HRP                       | Mouse          | 1:2000                                                             | Sigma Aldrich     |

Supplementary Table S2: Plasmids used.

| <b>Plasmid</b>      | <b>Species</b>             | <b>Backbone</b> |
|---------------------|----------------------------|-----------------|
| EphA4 CRISPR        | targeting Chick            | pX3361          |
| EphB2-GFP           | Mouse                      | pN2-GFP         |
| EphB2-FLAG          | Mouse                      | pCMV            |
| <i>e[Isl1]::GFP</i> | Chick                      | pBluescript     |
| GFP                 | <i>Aequorea victoria</i>   | pN2-GFP         |
| HD-PTP CRISPR       | targeting Chick (3 guides) | pX3361          |
| HD-PTP-FLAG         | Human                      | pcDNA3          |
| HD-PTP(C/S)-FLAG    | Human                      | pcDNA3          |
| HD-PTP-HA           | Human                      | pcDNA3          |

Supplementary Table S3: Cell lines used.

| <b>Name</b>                   | <b>Parental Cell Type</b> | <b>Description</b>                                                              |
|-------------------------------|---------------------------|---------------------------------------------------------------------------------|
| Control HEK                   | Flp-In T-REx HEK293       | Tetracycline inducible cell line expressing pcDNA5-pDEST-Empty Vector           |
| EphB2-OE HEK                  | Flp-In T-REx HEK293       | Tetracycline inducible cell line expressing pcDNA5-pDEST-EphB2-BirA*-FLAG       |
| Control HeLa                  | Flp-In T-REx HeLa         | Tetracycline inducible cell line expressing pcDNA5-pDEST-Empty Vector           |
| EphB2-OE HeLa                 | Flp-In T-REx HeLa         | Tetracycline inducible cell line expressing pcDNA5-pDEST-EphB2-BirA*-FLAG       |
| Control <sup>shRNA</sup> HeLa | HeLa                      | Lentiviral vector pLKO.1, selected with puromycin.                              |
| HD-PTP <sup>shRNA</sup> HeLa  | HeLa                      | Lentiviral vector shRNA targeting human HD-PTP pLKO.1, selected with puromycin. |

Supplementary Table S4: Quantifications of Main & Supplementary figures. All values are expressed as mean±SD.

|           |                                                                                                                                                                                                                                                                                                                                                                                                                                   |                                                                                                                                                                                             |
|-----------|-----------------------------------------------------------------------------------------------------------------------------------------------------------------------------------------------------------------------------------------------------------------------------------------------------------------------------------------------------------------------------------------------------------------------------------|---------------------------------------------------------------------------------------------------------------------------------------------------------------------------------------------|
| Figure 3b | Control <sup>shRNA</sup> (Fc): 1648±314.0<br>HD-PTP <sup>shRNA</sup> (Fc): 1573±36.94                                                                                                                                                                                                                                                                                                                                             | Control <sup>shRNA</sup> (eB2): 687.7±52.93<br>HD-PTP <sup>shRNA</sup> (eB2): 1200±80.93                                                                                                    |
| Figure 3d | Control <sup>shRNA</sup> (Fc): 1434±260.4<br>HD-PTP <sup>shRNA</sup> (Fc): 1787±525.9                                                                                                                                                                                                                                                                                                                                             | Control <sup>shRNA</sup> (S3A): 505.9±87.06<br>HD-PTP <sup>shRNA</sup> (S3A): 603.0±58.15                                                                                                   |
| Figure 4c | Control <sup>CRISPR</sup> : 2393±398.5                                                                                                                                                                                                                                                                                                                                                                                            | HD-PTP <sup>CRISPR</sup> : 790.4±51.20                                                                                                                                                      |
| Figure 4d | Control <sup>CRISPR</sup> : 21889±1836                                                                                                                                                                                                                                                                                                                                                                                            | HD-PTP <sup>CRISPR</sup> : 10931±1133                                                                                                                                                       |
| Figure 5a | Control <sup>CRISPR</sup> (Fc): 17.75±4.856<br>HD-PTP <sup>CRISPR</sup> (Fc): 24.07±4.202<br>Control <sup>CRISPR</sup> (Fc): 17.13 ±1.887<br>HD-PTP <sup>CRISPR</sup> (Fc): 15.00±4.397<br>HD-PTP <sup>CRISPR</sup> + hHD-PTP (Fc): 18.00±2.309<br>HD-PTP <sup>CRISPR</sup> + hHD-PTP (eB2): 83.50±4.123<br>HD-PTP <sup>CRISPR</sup> + hHD-PTP C/S (Fc): 18.75±2.217<br>HD-PTP <sup>CRISPR</sup> + hHD-PTP C/S (eB2): 82.50±2.082 | Control <sup>CRISPR</sup> (eB2): 85.00±2.582<br>HD-PTP <sup>CRISPR</sup> (eB2): 48.51±4.202<br>Control <sup>CRISPR</sup> (S3F): 91.38±2.250<br>HD-PTP <sup>CRISPR</sup> (S3F): 92.88 ±1.250 |
| Figure 6b | Control <sup>CRISPR</sup> (Fc): 5.642±4.487<br>HD-PTP <sup>CRISPR</sup> (Fc): 5.735±3.033                                                                                                                                                                                                                                                                                                                                         | Control <sup>CRISPR</sup> (eB2): 52.39±3.250<br>HD-PTP <sup>CRISPR</sup> (eB2): 5.867±5.644                                                                                                 |
| Figure 6d | Control <sup>shRNA</sup> (Fc): 1.501±0.6270<br>HD-PTP <sup>shRNA</sup> (Fc): 1.119±0.2813                                                                                                                                                                                                                                                                                                                                         | Control <sup>shRNA</sup> (eB2): 3.140±0.5684<br>HD-PTP <sup>shRNA</sup> (eB2): 0.9570±0.0663                                                                                                |
| Figure 6f | Control <sup>CRISPR</sup> (Fc): 5.172±1.208<br>HD-PTP <sup>CRISPR</sup> (Fc): 4.673±2.886                                                                                                                                                                                                                                                                                                                                         | Control <sup>CRISPR</sup> (eB2): 29.08±7.678<br>HD-PTP <sup>CRISPR</sup> (eB2): 25.76±5.827                                                                                                 |
| Figure 6h | Control <sup>CRISPR</sup> (Fc): 4.831±5.123<br>HD-PTP <sup>CRISPR</sup> (Fc): 4.069±1.409<br>Control <sup>CRISPR</sup> (Perm): 38.92±2.550                                                                                                                                                                                                                                                                                        | Control <sup>CRISPR</sup> (eB2): 21.37±5.291<br>HD-PTP <sup>CRISPR</sup> (eB2): 5.673±4.208<br>HD-PTP <sup>CRISPR</sup> (Perm): 39.90±6.063                                                 |
| Figure 7b | Control <sup>CRISPR</sup> (Fc): 20.79±1.850<br>HD-PTP <sup>CRISPR</sup> (Fc): 20.28±2.251                                                                                                                                                                                                                                                                                                                                         | Control <sup>CRISPR</sup> (eB2): 29.85±3.073<br>HD-PTP <sup>CRISPR</sup> (eB2): 17.89±0.8117                                                                                                |
| Figure 7d | Control <sup>shRNA</sup> (Fc): 11.03±1.630<br>HD-PTP <sup>shRNA</sup> (Fc): 9.694±2.865                                                                                                                                                                                                                                                                                                                                           | Control <sup>shRNA</sup> (eB2): 19.39±2.941<br>HD-PTP <sup>shRNA</sup> (eB2): 11.67±3.955                                                                                                   |
| Figure 7f | Control <sup>shRNA</sup> (0'): 1.789±0.2663<br>Control <sup>shRNA</sup> (Fc, 15'): 1.625±0.34<br>Control <sup>shRNA</sup> (Fc, 30'): 1.066±0.045<br>Control <sup>shRNA</sup> (Fc, 60'): 0.7943±0.038                                                                                                                                                                                                                              | Control <sup>shRNA</sup> (eB2, 15'): 1.524±0.281<br>Control <sup>shRNA</sup> (eB2, 30'): 1.448±0.032<br>Control <sup>shRNA</sup> (eB2, 60'): 1.098±0.165                                    |

|            |                                                                                                                                                                                                                           |                                                                                                                                                         |
|------------|---------------------------------------------------------------------------------------------------------------------------------------------------------------------------------------------------------------------------|---------------------------------------------------------------------------------------------------------------------------------------------------------|
| Figure 7h  | HD-PTP <sup>shRNA</sup> (0'): 1.753± 0.241<br>HD-PTP <sup>shRNA</sup> (Fc, 15'): 1.108±0.078<br>HD-PTP <sup>shRNA</sup> (Fc, 30'): 0.8521±0.024<br>HD-PTP <sup>shRNA</sup> (Fc, 60'): 0.5659±0.228                        | HD-PTP <sup>shRNA</sup> (eB2, 15'): 1.150±0.057<br>HD-PTP <sup>shRNA</sup> (eB2, 30'): 0.5884±0.087<br>HD-PTP <sup>shRNA</sup> (eB2, 60'): 0.08415±0.02 |
| Figure 7j  | Control <sup>shRNA</sup> (0'): 1.574±0.07331<br>Control <sup>shRNA</sup> (Fc CHX): 0.8841±0.1126<br>Control <sup>shRNA</sup> (Fc NH <sub>4</sub> Cl): 1.295±0.2980                                                        | Control <sup>shRNA</sup> (eB2 CHX): 1.100±0.08125<br>Control <sup>shRNA</sup> (eB2 NH <sub>4</sub> Cl): 1.313±0.2985                                    |
| Figure 7l  | HD-PTP <sup>shRNA</sup> (0'): 1.537±0.1981<br>HD-PTP <sup>shRNA</sup> (Fc CHX): 0.5636±0.1304<br>HD-PTP <sup>shRNA</sup> (Fc NH <sub>4</sub> Cl): 1.276±0.3053                                                            | HD-PTP <sup>shRNA</sup> (eB2 CHX): 0.2807±0.04096<br>HD-PTP <sup>shRNA</sup> (eB2 NH <sub>4</sub> Cl): 1.408±0.3349                                     |
| Figure 8b  | Control <sup>CRISPR</sup> : 50.07±1.436                                                                                                                                                                                   | HD-PTP <sup>CRISPR</sup> : 49.57±2.701                                                                                                                  |
| Figure 8c  | Control <sup>CRISPR</sup> : 90.75±5.497                                                                                                                                                                                   | HD-PTP <sup>CRISPR</sup> : 90.98±5.235                                                                                                                  |
| Figure 8e  | Control <sup>CRISPR</sup> (dorsal %GFP): 7.00±4.06<br>Control <sup>CRISPR</sup> (ventral %GFP): 93.00±4.06<br>HD-PTP <sup>CRISPR</sup> (dorsal %GFP): 25.80±13.48<br>HD-PTP <sup>CRISPR</sup> (ventral %GFP): 74.20±13.48 |                                                                                                                                                         |
| Figure S1b | Empty Vector: 0.0458±0.0387<br>Fc: 1.505±0.3059                                                                                                                                                                           | No Ligand: 1.893±0.3299<br>eB2: 1.707±0.3652                                                                                                            |
| Figure S1d | Empty Vector: 2.300±0.6790<br>Fc : 2.258±0.6001                                                                                                                                                                           | No Ligand: 2.531±0.4903<br>eB2 : 2.462±0.6999                                                                                                           |
| Figure S1g | Control <sup>shRNA</sup> : 1.260±0.2576                                                                                                                                                                                   | HD-PTP <sup>shRNA</sup> : 0.6895±0.1811                                                                                                                 |
| Figure S1i | Control <sup>shRNA</sup> : 11025±1484                                                                                                                                                                                     | HD-PTP <sup>shRNA</sup> : 14315±2411                                                                                                                    |
| Figure S1j | Control <sup>shRNA</sup> : 23811±1849                                                                                                                                                                                     | HD-PTP <sup>shRNA</sup> : 24681±4852                                                                                                                    |
| Figure S3a | Control <sup>CRISPR</sup> : 71.48±5.161                                                                                                                                                                                   | HD-PTP <sup>CRISPR</sup> : 65.36±7.941                                                                                                                  |
| Figure S3c | Control <sup>CRISPR</sup> : 12084±1380<br>HD-PTP-OE: 13173±1269                                                                                                                                                           | HD-PTP <sup>CRISPR</sup> : 11615±1264                                                                                                                   |
| Figure S3h | Control <sup>CRISPR</sup> : 11100±452.5<br>HD-PTP <sup>CRISPR</sup> + hHD-PTP: 12244±1456<br>HD-PTP <sup>CRISPR</sup> + hHD-PTP C/S: 12192±1407                                                                           |                                                                                                                                                         |
| Figure S4b | Control <sup>shRNA</sup> (Fc): 3.473 ±0.7610<br>HD-PTP <sup>shRNA</sup> (Fc): 3.398 ±0.3151                                                                                                                               | Control <sup>shRNA</sup> (eB2): 3.185 ±1.224<br>HD-PTP <sup>shRNA</sup> (eB2): 3.529 ±0.8591                                                            |

|            |                                                                                                                                           |                                                                                                                                            |
|------------|-------------------------------------------------------------------------------------------------------------------------------------------|--------------------------------------------------------------------------------------------------------------------------------------------|
| Figure S4d | Control <sup>shRNA</sup> (Fc): 11.52±1.270<br>HD-PTP <sup>shRNA</sup> (Fc): 8.124±3.192                                                   | Control <sup>shRNA</sup> (eB2): 26.44±4.077<br>HD-PTP <sup>shRNA</sup> (eB2): 7.133±2.886                                                  |
| Figure S4f | Control <sup>shRNA</sup> (Fc): 0.5007 ±0.1484<br>HD-PTP <sup>shRNA</sup> (Fc): 0.3752 ±0.0385                                             | Control <sup>shRNA</sup> (eB2): 1.470 ±0.5673<br>HD-PTP <sup>shRNA</sup> (eB2): 0.2512 ±0.1637                                             |
| Figure S4g | Control <sup>shRNA</sup> (Fc): 3.094 ±0.3629<br>HD-PTP <sup>shRNA</sup> (Fc): 2.065 ±0.2201                                               | Control <sup>shRNA</sup> (eB2): 2.139 ±0.2712<br>HD-PTP <sup>shRNA</sup> (eB2): 2.386 ±0.2592                                              |
| Figure S4i | Control <sup>shRNA</sup> (Fc): 0.3488±0.3369<br>HD-PTP <sup>shRNA</sup> (Fc): 1.151±1.253                                                 | Control <sup>shRNA</sup> (eB2): 43.96±4.716<br>HD-PTP <sup>shRNA</sup> (eB2): 40.55±5.623                                                  |
| Figure S4k | Control <sup>shRNA</sup> (Fc): 2.903±0.9730<br>HD-PTP <sup>shRNA</sup> (Fc): 3.192±0.2961<br>Control <sup>shRNA</sup> (Perm): 60.27±6.625 | Control <sup>shRNA</sup> (eB2): 36.55±4.791<br>HD-PTP <sup>shRNA</sup> (eB2): 3.108 ±0.7202<br>HD-PTP <sup>shRNA</sup> (Perm): 59.26±10.24 |
| Figure S4m | Control <sup>shRNA</sup> (Fc): 0.00±0.00<br>HD-PTP <sup>shRNA</sup> (Fc): 0.00±0.00<br>Control <sup>shRNA</sup> (Perm): 81.72±8.938       | Control <sup>shRNA</sup> (eB2): 0.00±0.00<br>HD-PTP <sup>shRNA</sup> (eB2): 0.00±0.00<br>HD-PTP <sup>shRNA</sup> (Perm): 85.14±3.633       |
| Figure S4o | Control <sup>CRISPR</sup> (Fc): 0.00±0.00<br>HD-PTP <sup>CRISPR</sup> (Fc): 0.00±0.00<br>Control <sup>CRISPR</sup> (Perm): 79.75±10.23    | Control <sup>CRISPR</sup> (eB2): 0.00±0.00<br>HD-PTP <sup>CRISPR</sup> (eB2): 0.00±0.00<br>HD-PTP <sup>CRISPR</sup> (Perm): 85.09±3.004    |
